# Supplementary material for: Direct observation and rational design of nucleation behavior in addressable self-assembly
Source: PubMed Central journal article supplement — Proc Natl Acad Sci U S A. 2018 Jun 11;115(26):E5877–86. doi: 10.1073/pnas.1806010115 (PMC6042111; doi:10.1073/pnas.1806010115), 2018-06-11
Supplement: pnas.1806010115.sapp.pdf [file pnas.1806010115.sapp.pdf]

# Supplementary material:

## Direct observation and rational design of nucleation behavior in addressable self-assembly

Martin Sajfutdinow,<sup>1,2</sup> William M. Jacobs,<sup>3</sup> Aleks Reinhardt,<sup>4</sup> Christoph Schneider,<sup>1</sup> and David M. Smith<sup>1</sup>

<sup>1</sup>*Fraunhofer Institute for Cell Therapy and Immunology IZI, Department of Diagnostics, Perlickstraße 1, 04103 Leipzig, Germany*

<sup>2</sup>*Faculty of Chemistry and Mineralogy, Leipzig University, Johannisallee 29, 04103 Leipzig, Germany*

<sup>3</sup>*Department of Chemistry and Chemical Biology, Harvard University, 12 Oxford Street, Cambridge, Massachusetts 02138, United States*

<sup>4</sup>*Department of Chemistry, University of Cambridge, Lensfield Road, Cambridge, CB2 1EW, United Kingdom*

(Dated: 9 April 2018)

### 1 EXTENDED METHODS

If not otherwise noted, chemicals were purchased from Sigma Aldrich Chemie GmbH (Munich, Germany).

#### 1.1 Annealing protocols

DNA sequences for the target cuboid structure are given in Sec. SI-5. For the all-BB system, sequences were taken from Ref. 1 (Table S8), and DNA strands were appropriately decoupled to split the relevant boundary bricks for the face-BB, edge-BB and no-BB systems. All sequences were purchased from Eurofins Genomics in 100  $\mu\text{M}$  stocks in  $\text{ddH}_2\text{O}$ , and then pooled using a Tecan Genesis Workstation 150 liquid handling robot. We used a strand concentration of 153 nM in 1  $\times$  assembly buffer, i.e., a solution of 15 mM  $\text{MgCl}_2$ , 0.5 mM EDTA and 5 mM Tris, pH 8. The strand solution was denatured at 90  $^\circ\text{C}$  for 10 min and then gradually cooled. We used two linear cooling protocols: (i) in the 15.2 h protocol, the reciprocal cooling rate was 12  $\text{min K}^{-1}$ , and (ii) in the 66 h protocol, it was 52  $\text{min K}^{-1}$ . The annealed samples were stored at 4  $^\circ\text{C}$ .

Prior to the reference DLS measurement (positive control), the all-BB sample assembled in the 66 h protocol was supplemented with 2.5 mM EDTA to reduce high-molecular-weight contamination. In the context of DLS experiments, we therefore refer to this sample as ‘purified’.

Prior to the reference AFM imaging (positive control), the all-BB sample assembled in the 66 h protocol was ultrafiltered using Amicon (UFC510024, Millipore, Merck KGaA, Darmstadt, Germany) filter units, with a molecular weight cut-off of 100 kDa, to reduce the fraction of small particle contamination and to improve the image quality. To this end, the assembled sample was mixed with pre-chilled 1  $\times$  assembly buffer to the maximum admitted volume and centrifuged for 10 min at 14 000g at 4  $^\circ\text{C}$ . Subsequently, the flowthrough was discarded, and the filter unit was loaded with buffer and centrifuged again. This process was repeated three times in total. Finally, the concentrated filtrate was eluted at 1000g for 2 min at 4  $^\circ\text{C}$ .

#### 1.2 Atomic force microscopy

Samples were prepared following the 66 h annealing protocol. A freshly cleaved mica disc was coated with 100  $\mu\text{L}$  of 0.5 wt% poly-L-ornithine solution for 5 min and rinsed three times with 1  $\times$  assembly buffer. In order to be able to image samples in liquid mode, an acrylic glass ring was glued by Thin Pour (Reprorubber) onto a slide to surround the mica disc and form

a fluid cell. For each sample, 1.5 pmol per brick was deposited on the coated mica for 10 min. Afterwards, the cell was filled with 1  $\times$  assembly buffer and imaged using the JPK Nanowizard 3 atomic force microscope and a BioLever Mini cantilever in intermittent contact mode in liquid. Images were recorded with a target amplitude of 15 nm.

Quenching experiments, designed to stop the hybridization reaction at a given temperature during the annealing protocol, were done by immobilizing 5  $\mu\text{L}$  of the reaction mixture on poly-L-ornithine coated and pre-equilibrated mica discs. As a negative control, the same procedure was performed using a random selection of ssDNA strands that did not contain complementary sequences.<sup>2</sup> For both the all-BB structure and the negative control, samples were quenched from 318 K, 314 K, 311 K, 308 K and 300 K during annealing protocol (i) and imaged by AFM, as described above, at ambient temperature.

#### 1.3 Agarose gel electrophoresis

Assembly of DNA brick structures was confirmed by non-denaturing agarose gel electrophoresis. Samples (300 fmol per brick) were analyzed on a gel made from 2 wt% agarose in 0.5  $\times$  TBE and 10 mM  $\text{MgCl}_2$ . Electrophoresis was performed at 80 V and 4  $^\circ\text{C}$  for 2 h. The gel was post-stained with 0.5  $\mu\text{g mL}^{-1}$  ethidium bromide solution and scanned in using the Intas GDS gel set instrument for structure visualization. To estimate structure yield, the band intensity was approximated by fitting densitometry profiles with an SQP algorithm to Gaussian functions using the GelBandFitter software.<sup>3</sup> The mass of the structure fractions was estimated via a 1 kb standard (GeneRuler, ThermoFischer Scientific) and related to the total mass loaded of 850 ng.

#### 1.4 Static and dynamic light scattering

The same conditions as in the 15.2 h annealing protocol were used and the measurement was performed in the last 2 min of the 12 min cooling step. 20  $\mu\text{L}$  samples were filled into ZEN2112 quartz cuvettes (Malvern), covered by molecular biology grade mineral oil, and sealed with a plastic lid that was further fixed with tape. Light scattering was measured using a Malvern Zetasizer NanoZSP apparatus at an angle of 173 $^\circ$ . The viscosity of the samples was determined at five temperatures spanning the region of interest and fitted to  $\eta/(10^{-5} \text{ Pa s}) = 1.78 \times \exp[617/(T/\text{K} - 138.5)]$ . The refractive index was measured to be 1.331.

For dynamic light scattering, the intensity auto-correlation

function was computed from 12 measurements at 10 s intervals. We interpreted the DLS data in the dilute limit by assuming that all particles diffused independently of one another, since the total strand concentration (approximately  $40 \mu\text{M}$ ) implies that single strands ( $R_h \sim 2.7 \text{ nm}$ ) in solution occupied a volume fraction of approximately 0.2%. We further assumed that, after the initial equilibration period of 10 min, the distribution of cluster sizes remained nearly constant over the DLS measurement period at the end of each temperature step; this assumption is consistent with our observations of rate-limiting structure nucleation.

When analyzing DLS data for solutions comprising a range of particle sizes, the inverse Laplace transform used to obtain a particle size distribution from the intensity auto-correlation function is not uniquely determined,<sup>4</sup> and the choice of fitting functions and parameters can affect the final result.<sup>5</sup> We have therefore computed multiple fits to the distribution of hydrodynamic radii using several regularization methods, including a range of different smoothing exponents and a maximum entropy constraint (Fig. S3). Although the agreement is not perfect for the individual data points, the trends for the distributions and the fits to a linear combination of Gaussian functions are nearly the same regardless of the regularization procedure used, indicating that the conclusions drawn from the DLS data are robust with respect to the choice of regularization method. We chose to use the smoothness constraint regularization method recommended in Ref. 5 with a smoothing exponent of  $m = 8/5$  (corresponding to Fig. S3b) for all data reported in the main text.

## 1.5 Fluorescence annealing

In the fluorescence annealing experiments, the same conditions as in the 15.2 h annealing protocol were used, except that 10 nM SYBR green I solution<sup>6</sup> was added to the strand mixture. SYBR green I in buffer solution was analyzed as a negative control. Samples were placed on a MicroAmp Fast Plate 96-well tray and sealed with adhesive film. The plate was loaded onto the ABI Prism 7900HT-Fast Real Time PCR system, with dye excitation effected by an argon ion laser at 488 nm. The fluorescence signal was detected at 525 nm every 8.5 s and averaged over time at each temperature, and its derivative with respect to temperature was computed numerically. The data were smoothed via a Gaussian filter with a standard deviation of 1.5 K.

## 2 MONITORING STRAND HYBRIDIZATION

### 2.1 Fluorescence measurements

We monitored the progress of domain hybridization during the annealing protocol via fluorescence, using SYBR green I as a double-stranded DNA probe (see Sec. 1.5).<sup>7</sup> We observed a dominant maximum in the fluorescence derivative between 335 K and 350 K for all structures with boundary bricks (Fig. S4a), indicating a significant amount of base-pairing at relatively high temperatures. However, as we discuss in the main text, no complete structures were assembled at these temperatures.

Comparison with theoretical annealing curves suggests that the assembly of boundary-brick structures is a two-step process. To demonstrate this, we show in Fig. S4b the temperature derivative of the equilibrium number of base pairs in a solution of monomers and dimers,<sup>8,9</sup> assuming that stable misbonding

between non-complementary domains cannot occur (see below). The high-temperature transitions correspond to the hybridization between pairs of boundary bricks (where continuous 24-bp segments are hybridized) or between one scaffold strand and one boundary brick (with 16-bp hybridized segments). Consequently, the assembly of the full structure must occur in the presence of these pre-formed clusters. These calculations also indicate that the fluorescence-signal contributions from each domain length overlap significantly, since the domain melting temperatures vary widely according to their specific sequences, and each hybridization reaction tends to occur over a broad ( $\gtrsim 10 \text{ K}$ ) range of temperatures. In particular, the theoretical annealing curves predict a broad maximum associated with the 8-bp domains near 295 K.

Analysis of fluorescence data has previously been used to distinguish between single- and multi-step assembly mechanisms for DNA tile systems with varying domain lengths. For example, a similar step-wise assembly process was seen in DX-tile structures comprising short (10- and 11-bp) and long (21-bp) hybridizations, and the presence of two distinct maxima in the fluorescence derivative was interpreted as evidence of hierarchical assembly.<sup>10</sup> By contrast, fluorescence measurements of DNA-brick crystallization using equal-length domains exhibited no evidence of hierarchical self-assembly.<sup>11</sup> In our measurements, there appear to be multiple local maxima in the annealing curves at temperatures below the scaffold-strand  $T_m \approx 315 \text{ K}$ , the highest temperature at which our theoretical calculations predict that a lattice of scaffold strands can be thermodynamically stable. However, these signals are significantly weaker than the higher-temperature hybridizations which dominate the fluorescence signal. Interpreting the lower-temperature maxima is additionally hindered by several known sources of bias, including high background signals<sup>6</sup> and the preferential binding of SYBR green I to GC-rich sequences.<sup>12</sup> Furthermore, the intercalating SYBR green I probes distort the double-helical structure of DNA molecules,<sup>13</sup> which increases their melting temperatures<sup>14</sup> and precludes a quantitative analysis.

### 2.2 Hybridization calculations

All hybridization calculations were carried out using the SantaLucia parameterization and the solution conditions described in the Methods section of the main text. In this section, we consider a two-state model (i.e. bonded or not bonded) for each domain and examine the simple case where pairs of strands hybridize to form dimers, but not larger multimers. We denote the hybridization free energy between complementary domains on a pair of strands  $i$  and  $j$  by  $\Delta G_{ij}$ . The equilibrium probability that a strand  $i$  is correctly hybridized with its putative neighbor strand  $j$  is

$$p_{ij}(T) = \frac{\rho \exp(-\Delta G'_{ij}/k_B T)}{1 + \rho \exp(-\Delta G'_{ij}/k_B T)}, \quad (1)$$

where  $\rho$  is the dimensionless strand number density,  $k_B$  is the Boltzmann constant,  $T$  is the absolute temperature, and we assume that all species are present in equal concentrations. The hybridization free energies are written as  $\Delta G'_{ij}$ , to indicate that we use the longest complementary subsequence of strands  $i$  and  $j$ , which, due to the random sequence design, is occasionally longer than the intended domain length. To calculate the total change in base-pairing during an annealing protocol (Fig. S4b), we took the temperature derivative of the ensemble average of

correctly formed base pairs,

$$\text{Hybridization} = -\frac{d}{dT} \sum_{\substack{i < j \\ j \in \mathcal{E}(i)}} l_{ij} p_{ij}(T), \quad (2)$$

where  $l_{ij}$  is the length of each hybridizing domain.

### 3 CLUSTER POPULATION RATIOS

We assume that annealing is slow, so that nucleation is always rate-limiting. We can write the nucleation barrier height as

$$F^\ddagger = -n^\ddagger k_B T \ln \rho_m + \varepsilon(T) E^\ddagger + C, \quad (3)$$

where  $n^\ddagger$  is the number of independent subunits in the critical nucleus,  $E^\ddagger$  is the number of 8-bp bonds in the critical nucleus, and  $C$  is a constant that accounts for the (effective) number of parallel nucleation pathways, as well as the rotational entropy terms. The bond energy  $\varepsilon$  is a decreasing function of temperature, while the per-species monomer concentration  $\rho_m$ , indicating the number of monomers per unit volume, also decreases as the reaction progresses. Initially, we have  $\rho_T$  of each species. For simplicity, let us assume that, given this initial monomer concentration, the barrier is infinitely high above some critical temperature  $T_0$ . Nucleation begins once  $T \leq T_0$ , where  $F^\ddagger$  is finite. (In reality, nucleation can begin as soon as the target structure, or any large cluster, becomes thermodynamically stable. However, the nucleation rate is proportional to  $\exp(-F^\ddagger/k_B T)$ , so the highest barrier that can be crossed depends on the cooling rate.)

Nucleation will proceed at a given temperature until  $\rho_m$  decreases to a point where  $F^\ddagger$  is again insurmountable. Denoting this critical barrier height by  $F_0^\ddagger$ , we can relate the final monomer concentration  $\rho_m$  at any temperature to the initial concentration at the critical temperature,

$$F_0^\ddagger - C = -n^\ddagger k_B T \ln \rho_m(T) + \varepsilon(T) E^\ddagger \quad (4)$$

$$= -n^\ddagger k_B T_0 \ln \rho_T + \varepsilon(T_0) E^\ddagger, \quad (5)$$

so that

$$\frac{\rho_T}{\rho_m} = \exp\left\{-\frac{E^\ddagger}{n^\ddagger} \left[\frac{\varepsilon(T)}{k_B T} - \frac{\varepsilon(T_0)}{k_B T_0}\right]\right\}. \quad (6)$$

Assuming that the intensity of each peak is proportional to the concentration of unassembled strands (m) or assembled structures (c), respectively, the ratio of the scattering intensities is

$$\frac{I_c}{I_m} = \frac{R_{h,c}^6}{N R_{h,m}^6} \left(\frac{\rho_T - \rho_m}{\rho_m}\right) \quad (7)$$

$$= \frac{R_{h,c}^6}{N R_{h,m}^6} \left(\exp\left\{-\frac{E^\ddagger}{n^\ddagger} \left[\frac{\varepsilon(T)}{k_B T} - \frac{\varepsilon(T_0)}{k_B T_0}\right]\right\} - 1\right), \quad (8)$$

where  $N$  is the number of distinct subunits in the target structure. Furthermore, because  $\varepsilon/k_B T$  is a nearly linear function of  $T$  in the range of interest (Fig. S9), we expect the intensity ratio to have a functional form

$$\frac{I_c}{I_m} = \text{const} \times \{\exp[-a(T - T_0)] - 1\}, \quad (9)$$

where  $a = (E^\ddagger/n^\ddagger)(d\beta\varepsilon/dT)$  and  $\beta = 1/k_B T$ . Using a linear fit to the energies as a function of temperature at temperatures

of interest (Fig. S9),  $d\beta\varepsilon/dT \approx 0.34 \text{ K}^{-1}$ . From the theoretical free-energy profiles shown in the main text, we know that for edge BBs,  $E^\ddagger/n^\ddagger = 7/6$ , whilst for face BBs, the ratio is  $6/5$ . Hence we can estimate that  $1/a \approx 2.5 \text{ K}$ .

To calculate the intensity associated with each peak in the DLS data, we first fitted a sum of Gaussians to the distribution function,  $f(R_h)$ . We then numerically integrated the peak associated with the Gaussian function  $f_g$ , according to

$$I_{c/m} = \int_0^\infty \min[f_{g,c/m}(R_h), f(R_h)] d \ln R_h. \quad (10)$$

In reality, the appearance of aggregates at low temperatures, which tend to increase the mean  $R_h$  of the assembled population, means that the ratio of the scattering intensities is not exactly proportional to the ratio of the cluster concentrations. However, this effect is relatively small over the range of temperatures of interest (approximately 8 kelvin below  $T_0$ ; see Fig. 4a). Instead, the exponential increase in the intensity ratio as a function of decreasing temperature shown in Fig. 5c is driven primarily by an exponential decrease in the scattering intensity of the unassembled population upon cooling below  $T_0$ . Such behavior is consistent with the theoretically predicted evolution of the unassembled-strand population shown in Fig. 5b.

## 4 SUPPLEMENTAL FIGURES

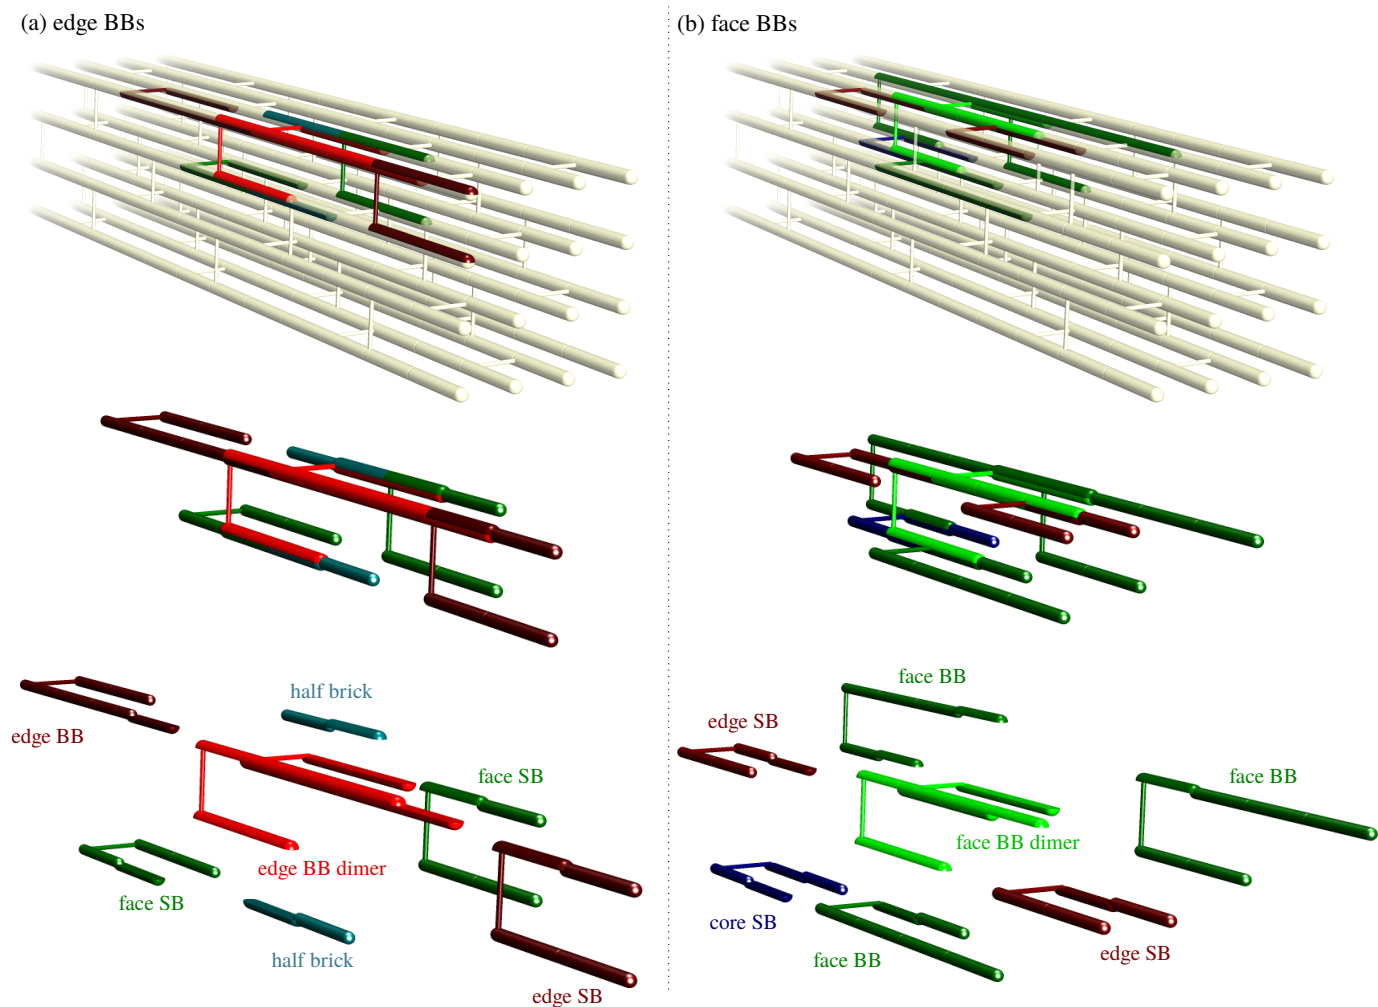

FIG. S1. Boundary brick dimers and their nearest neighbors in a schematic representation. In the top panel, the location within the target structure is shown. In the bottom panel, the neighbors are shown spread out and labeled to make their identification clearer. ‘SB’ stands for a 32-nt ‘scaffold brick’. The edge-BB system’s nucleation properties were also investigated by merging some bricks, as described in the main text. In particular, the ‘merged-A’ building block corresponds to the edge BB dimer shown in red. The ‘merged-B’ building block corresponds to the edge BB dimer and one of the face SBs shown in dark green. Either one of these face SBs could have been chosen, as both of them have direct connections to core strands. In our simulations, the face SB that is merged with the edge BB dimer is the one whose center of mass is nearer the cuboid’s principal axis in the target structure.



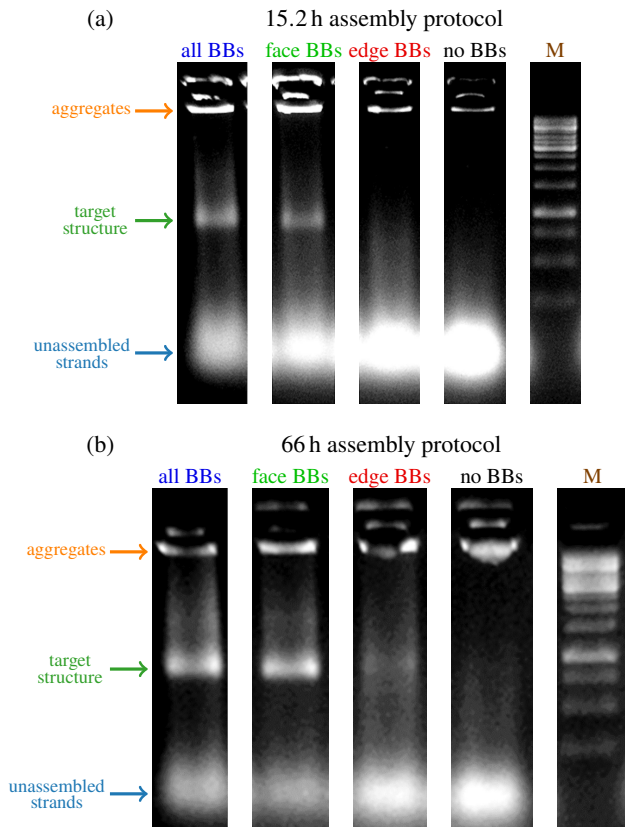

FIG. S2. Gel electrophoresis of samples at the end of (a) 15.2 hour or (b) 66 hour linear assembly protocols. Samples were assayed in 2% agarose gel. Lane M contains a GeneRuler 1 kb ladder that was used to reference the assembly yield. The bands corresponding to the target structures, unassembled strands and aggregates are indicated.

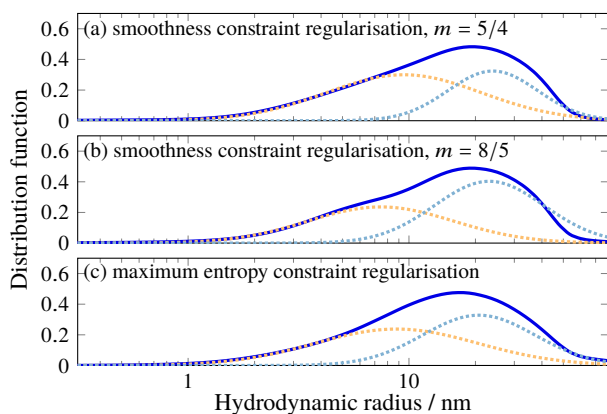

FIG. S3. Example size distribution functions (solid blue lines) for the all-BB system at 310 K determined using three regularization methods. We used a smoothness constraint functional<sup>4</sup> with smoothing exponents<sup>5</sup> of (a)  $m = 5/4$  and (b)  $m = 8/5$ , as well as (c) a maximum entropy constraint with a Gaussian prior distribution.<sup>5</sup> Dotted lines show the Gaussian functions determined by fitting a linear combination of Gaussians to each distribution function.

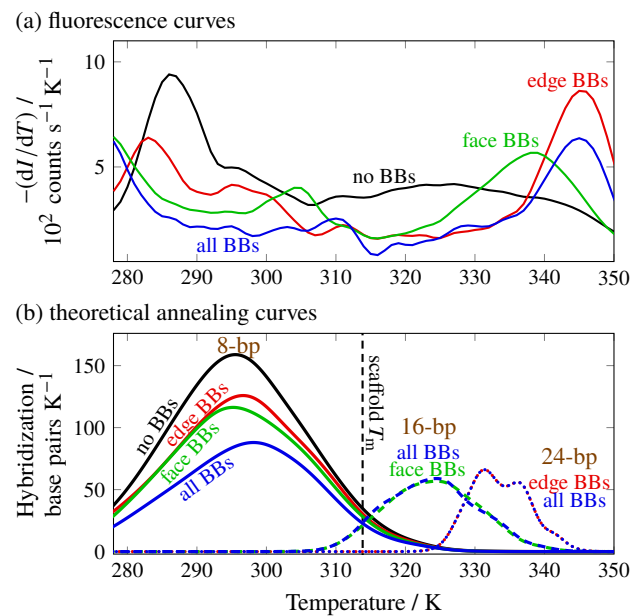

FIG. S4. (a) The derivative of the fluorescence signal  $I$  with respect to the temperature obtained from a 15.2 h annealing protocol. (b) The corresponding theoretical annealing curves (see Sec. 2.2). In agreement with the experimental fluorescence data, contributions from 16- (dashed lines) and 24-bp (dotted lines) hybridizations dominate at higher temperatures. The predicted scaffold-strand  $T_m$  is also shown.

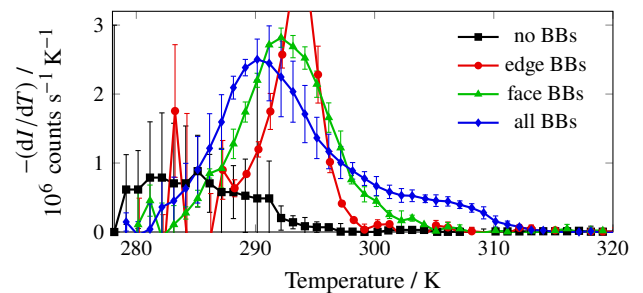

FIG. S5. The derivative of the static light scattering intensity  $I$  with respect to temperature for self-assembly following the 15.2 h annealing protocol.

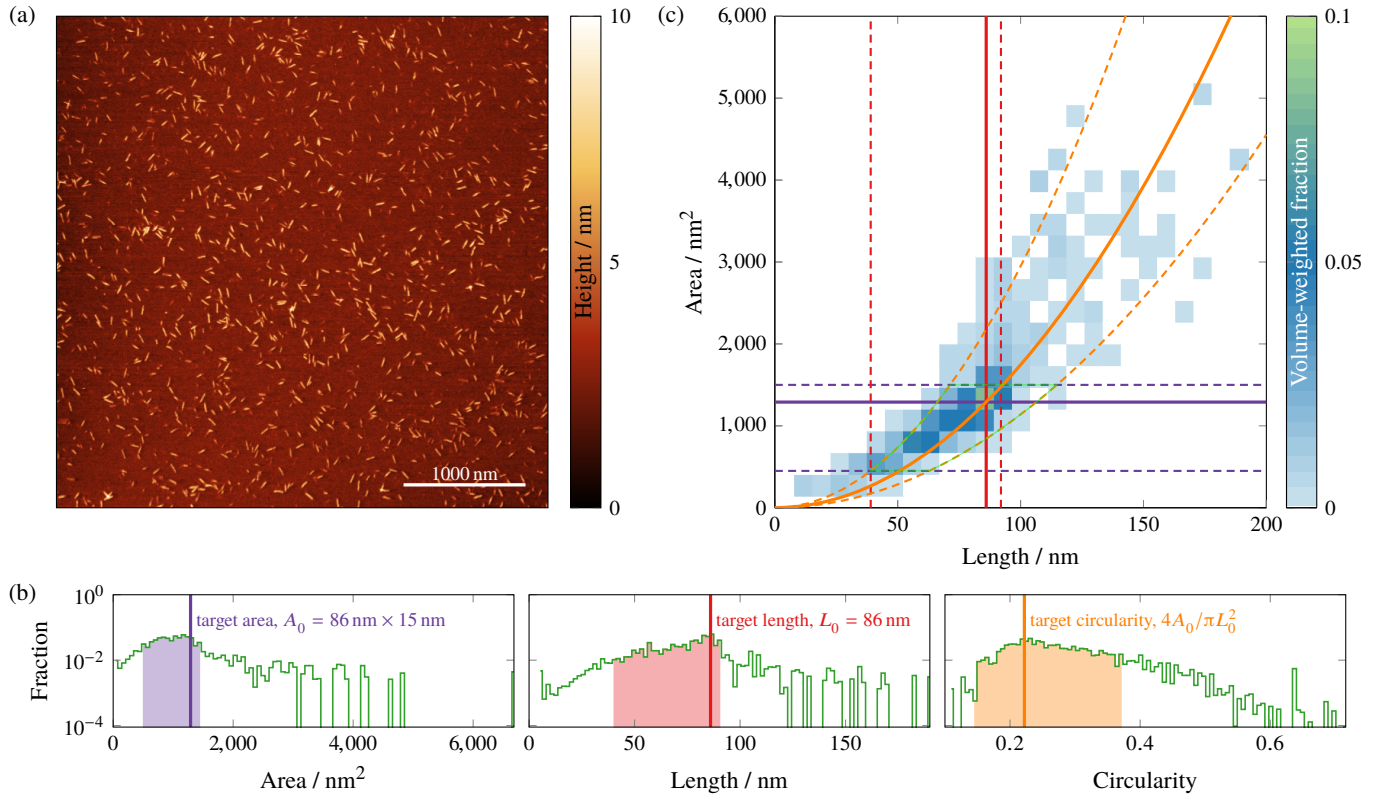

FIG. S6. Criteria for identifying target structures via AFM. (a) AFM image of the positive-control all-BB structures (see Sec. 1.1). (b) Area, length and circularity distributions of the particles identified in this image (see Methods). All distributions are weighted by the particle volume to prevent tiny particles from skewing the distributions. The solid vertical lines show the expected values for an ideal target structure when treating the cuboid as a cylinder with diameter  $d \sim 15$  nm. (c) Two-dimensional volume-weighted distribution of imaged particle areas and lengths. The solid lines indicate the expected values for an ideal target structure, while the dashed lines correspond to the boundaries of the shaded regions in panel (b); the parabolic curves show the circularity,  $4A/\pi L^2$ . Notably, the peak of this distribution (green square) coincides with the expected area, length and circularity. Based on this distribution, we chose to use the area and circularity criteria ( $450 \text{ nm}^2 \leq A \leq 1500 \text{ nm}^2$  and  $0.145 \leq 4A/\pi L^2 \leq 0.375$ , indicated by the translucent green lines) to identify particles as correctly assembled structures. Using these criteria, the AFM-determined yield of the positive control is 53 %.

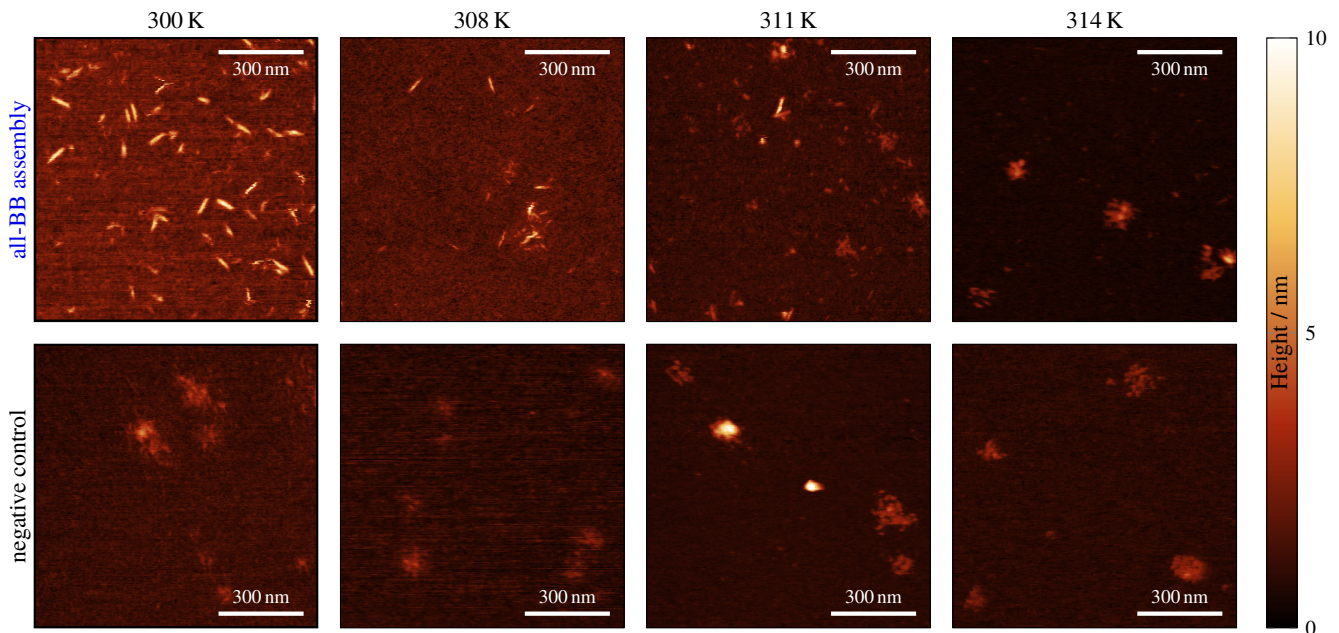

FIG. S7. AFM images for all-BB structures (top row) and negative controls (bottom row). Samples were prepared by rapidly quenching the system from the indicated temperature (column labels) during the annealing protocol (see Sec. 1.2). The negative control consists of a collection of similar-length oligonucleotides that were not designed to have complementary sequences. The bright amorphous clusters seen in the negative control and the all-BB structures quenched from high temperatures indicate large aggregates of oligonucleotides that form during quenching.

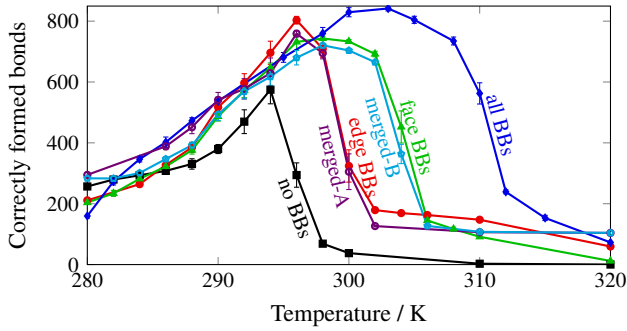

FIG. S8. The number of correctly formed bonds in the system as a function of temperature from Monte Carlo simulations. Each data point corresponds to an average over ten independent simulations in the long time limit once nucleation has occurred. Error bars give the standard deviation in each case.

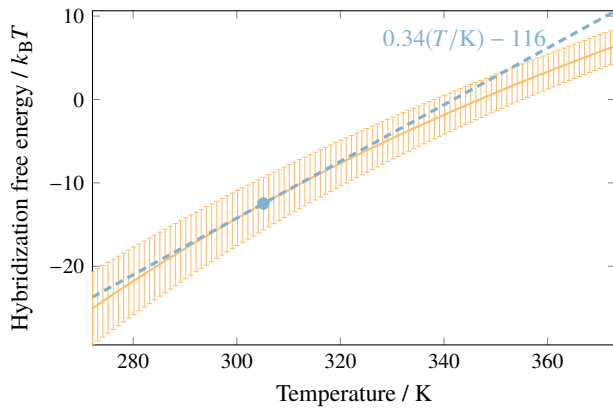

FIG. S9. The mean hybridization free energies of 8-bp interactions as a function of temperature for the no-BB structure, computed via the SantaLucia thermodynamic model,<sup>8</sup> with error bars reflecting the standard deviation. The tangent to the curve at 305 K is also shown, demonstrating that the hybridization free energy is well described by a linear function over the region of interest (295 K to 315 K).

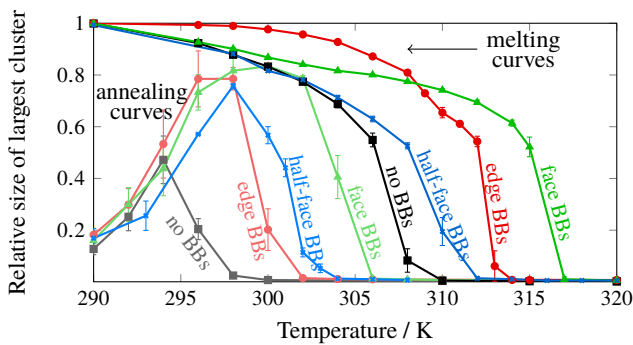

FIG. S10. Melting and annealing curves for the half-face BB structure in Monte Carlo simulations (cf. Fig. 4c and Fig. 6b).

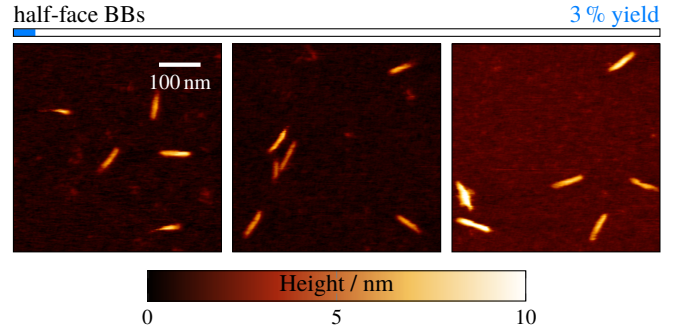

FIG. S11. AFM images and the yield, as determined by gel electrophoresis, for the half-face BB structure.

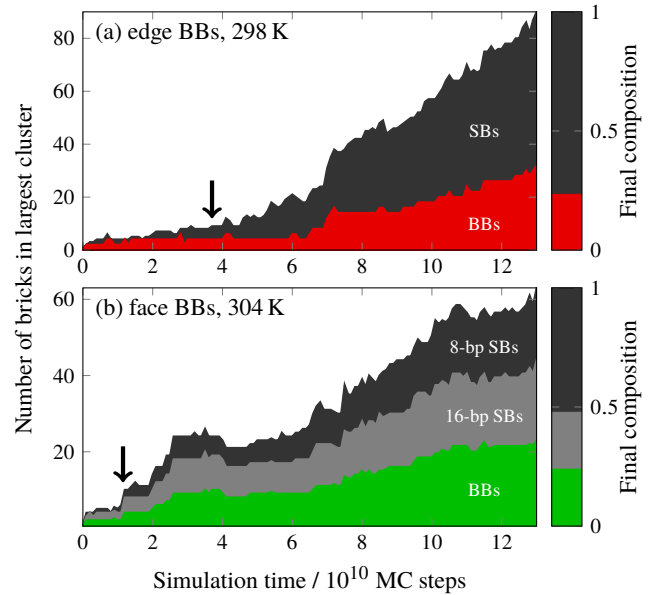

FIG. S12. The size of the largest cluster as a function of time in representative Monte Carlo trajectories for the (a) edge-BB and (b) face-BB systems. The composition of the largest cluster is shown in terms of boundary bricks (BBs) and scaffold bricks (SBs). In the face-BB system, the scaffold bricks are further divided into those that have only 8-bp hybridizations with neighboring bricks and those which form 16-bp hybridizations with face BBs. The relative proportions of each type of brick in the target structure are shown in the right-hand panel in each case. Both trajectories start at roughly the point where a fluctuation leads to nucleation and subsequent growth. Arrows indicate approximately where the theoretically predicted post-critical nucleus (see Fig. 7) first appears in each trajectory. In (a), this cluster has two BB dimers (four BBs) and four SBs. In (b), this cluster has three BB-SB dimers (three BBs and three 16-bp SBs) and two 8-bp SBs. In both cases, the cluster size increases rapidly after this nucleation event. BBs dominate in the early part of the growth phase shown here, where they comprise a greater proportion of the post-critical clusters than they do in the final assembled structure.

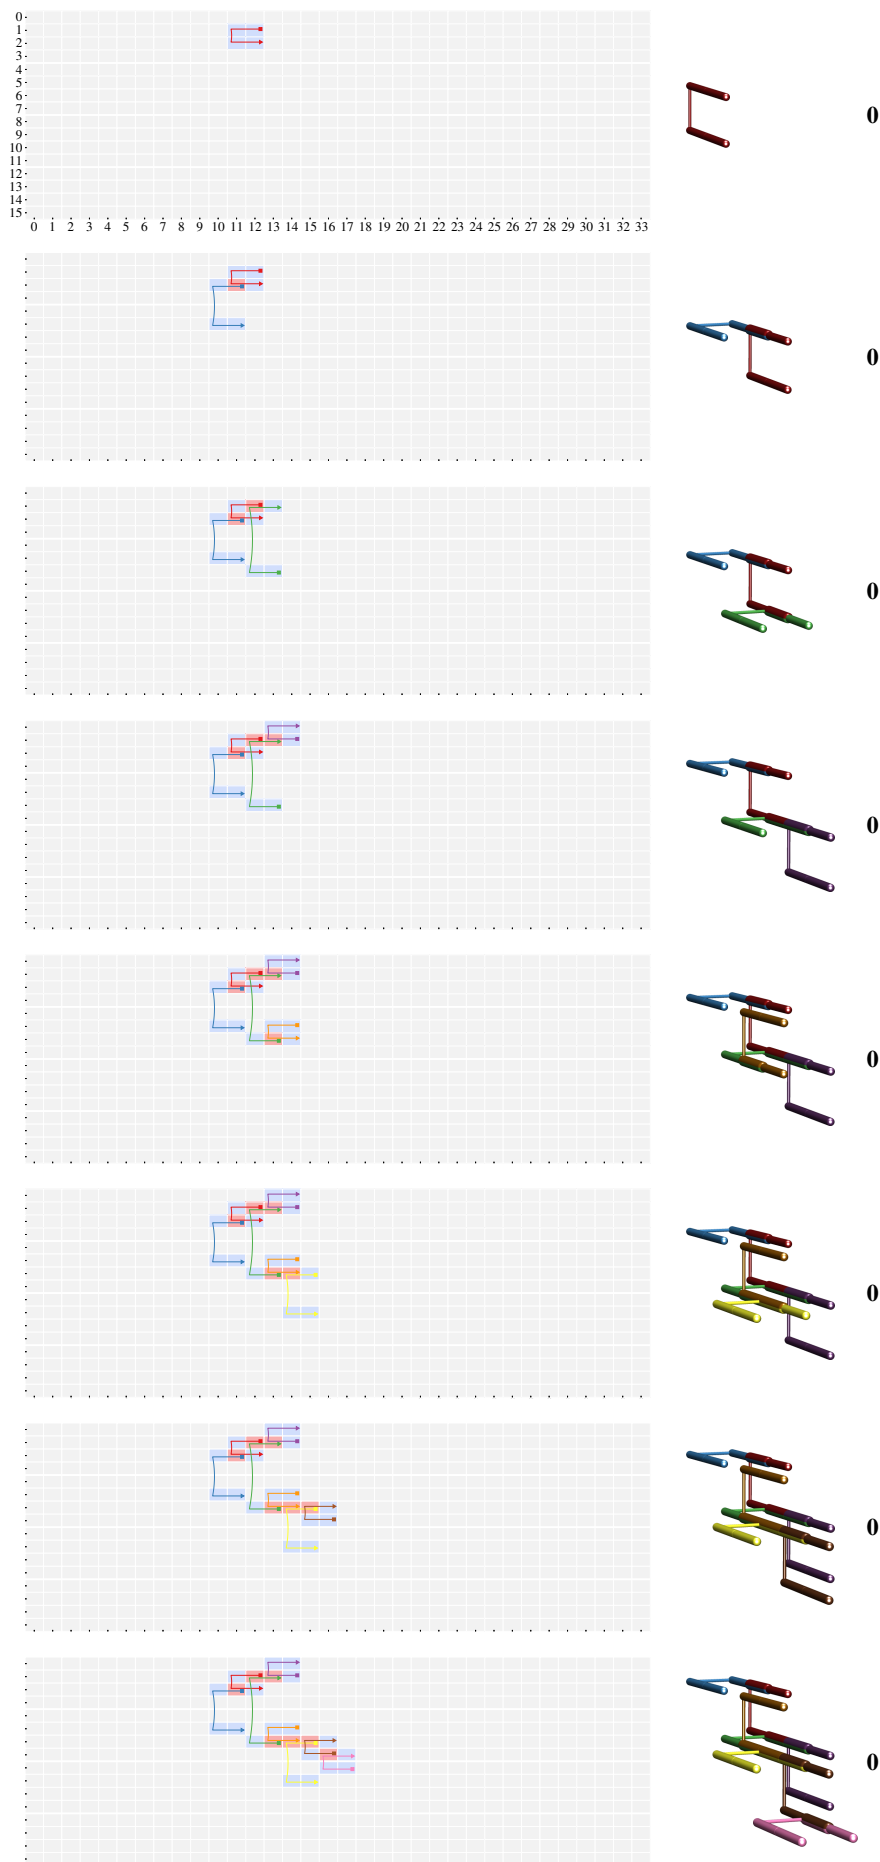

FIG. S13. Example low free-energy nucleation pathway for the no-BB system in two representations: a Cadnano-style connectivity diagram and a three-dimensional rendering. In the latter, DNA brick domains are represented by cylinders. Non-bonded domains are represented by smaller cylinders, while where two DNA bricks are bonded, larger multicolored cylinders are used. Each new monomer or multimer added to the cluster along the nucleation pathway is colored in a different hue. The bold number to the right of each structure indicates the number of multimers in the structure.



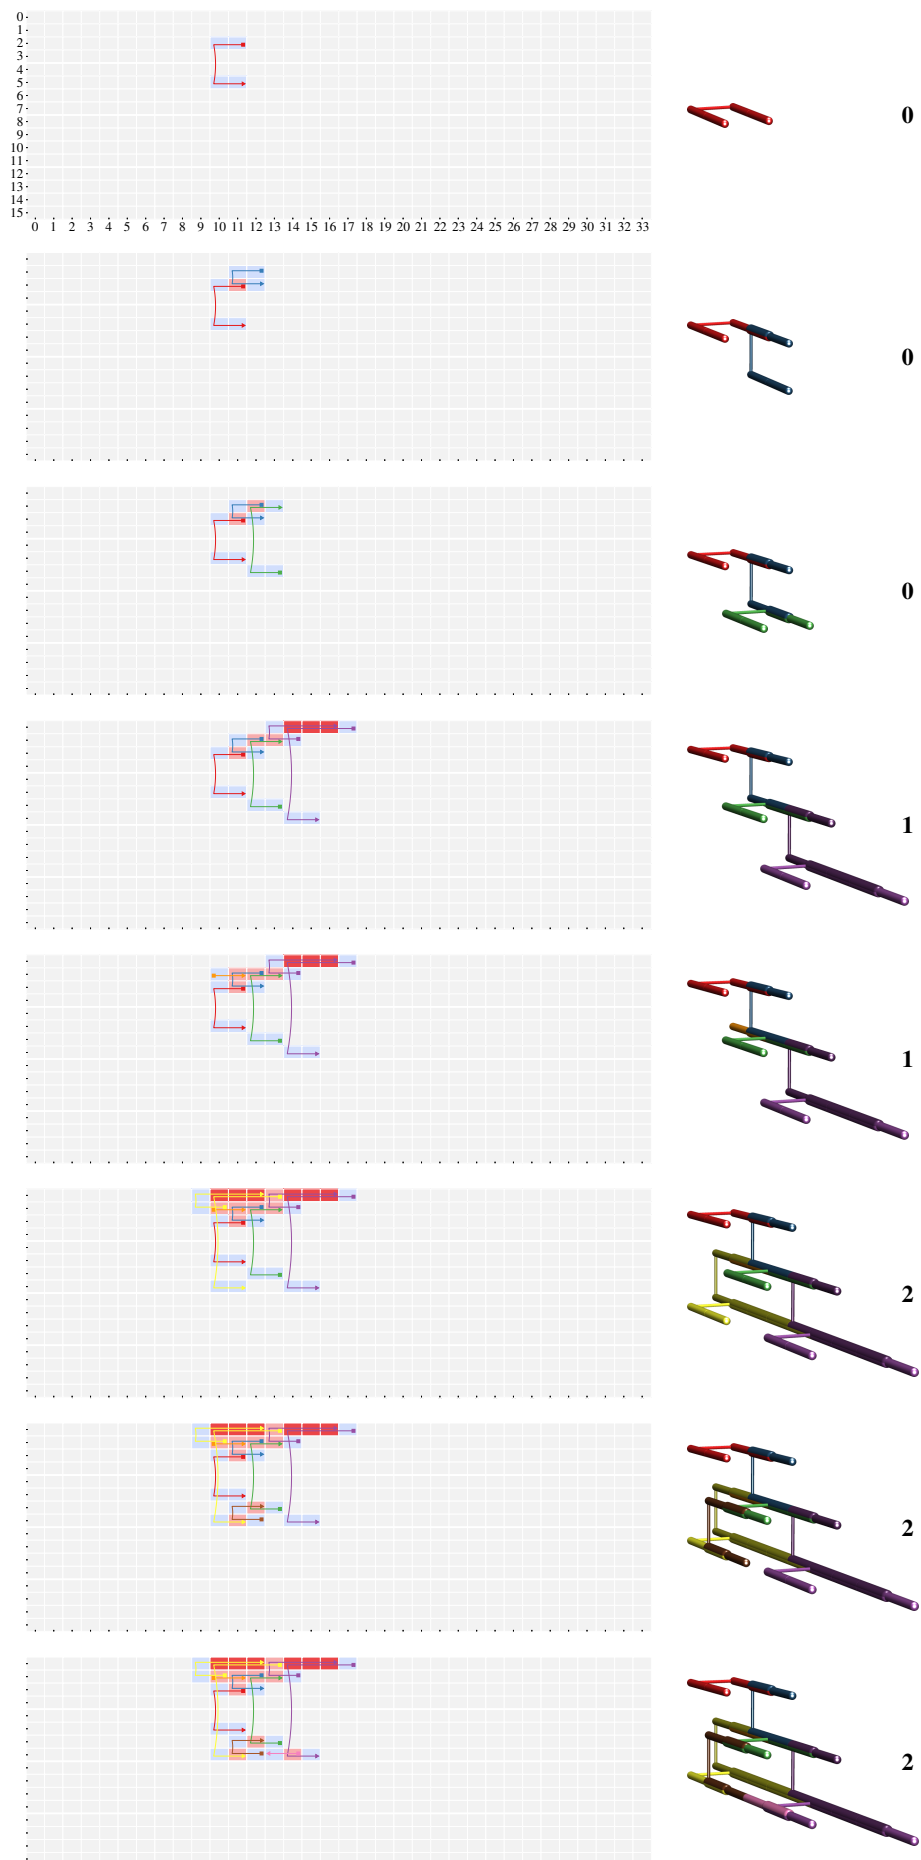

FIG. S14. Example low free-energy nucleation pathway for the edge-BB system in two representations, as in Fig. S13.

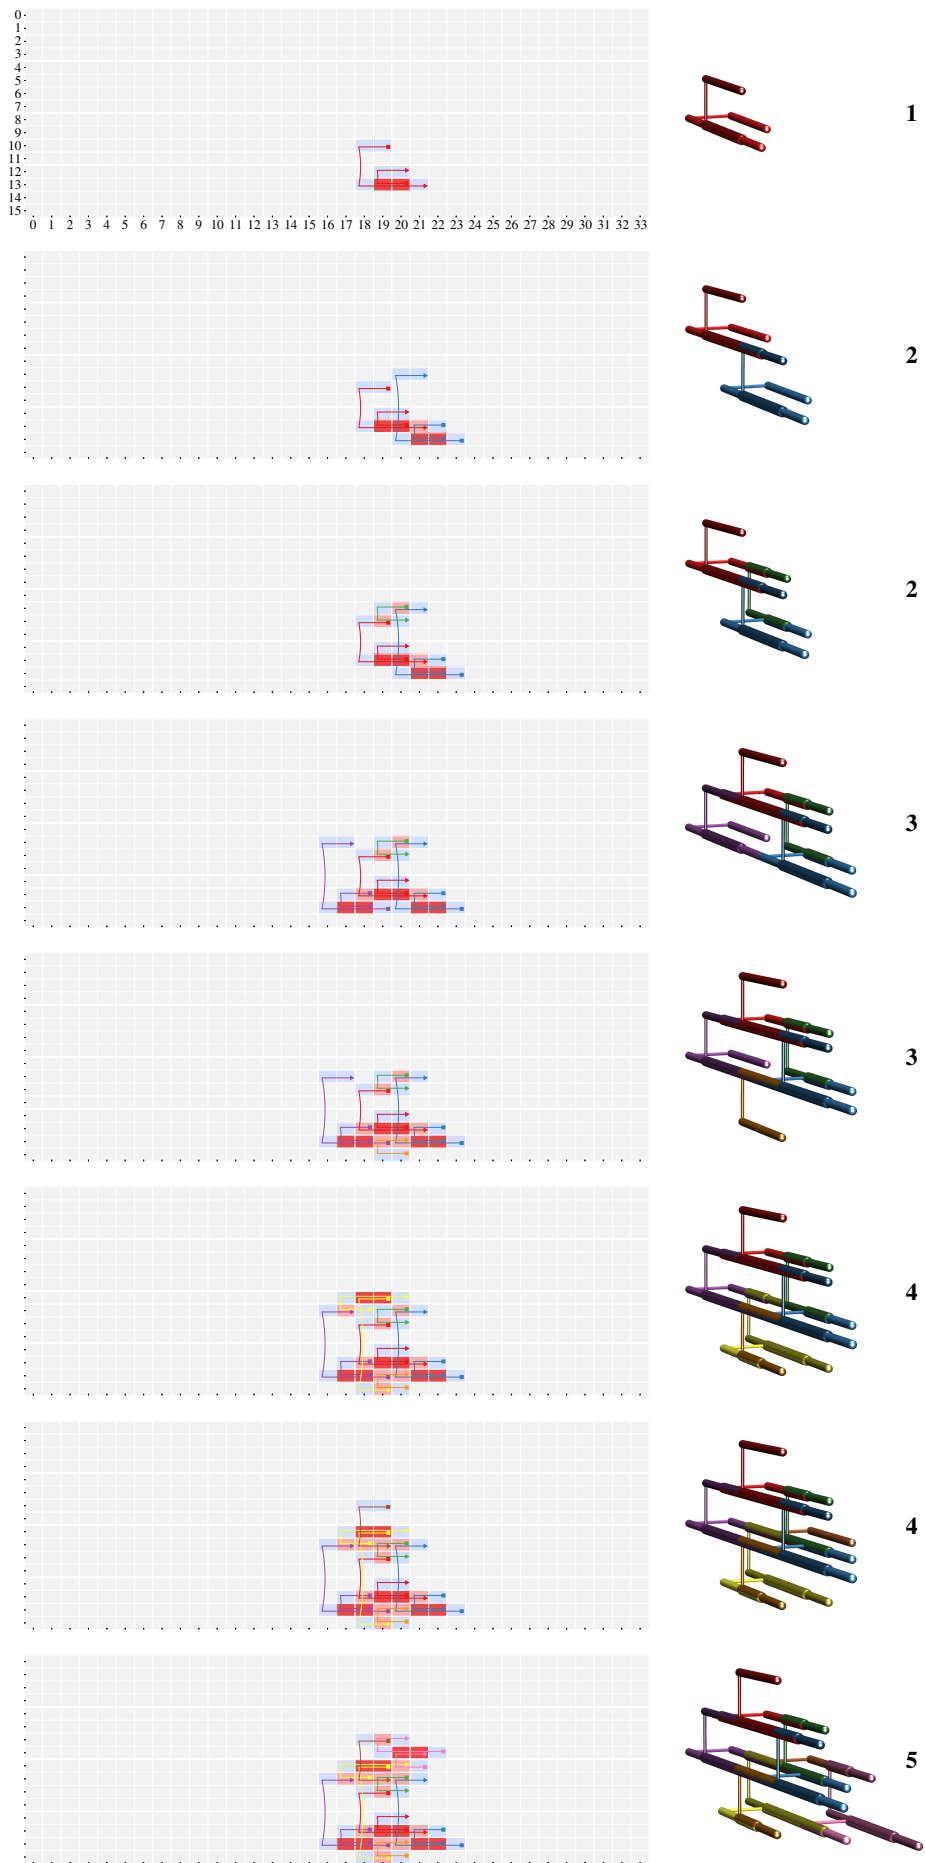

FIG. S15. Example low free-energy nucleation pathway for the face-BB system in two representations, as in Fig. S13.

5 DNA BRICK SEQUENCES

The following sequences comprise our library of DNA bricks.

| ID | Sequence                                               |
|----|--------------------------------------------------------|
| 1  | TTCTTAAA TTTTTTTT                                      |
| 2  | TGGCTGA TTTTTTTT                                       |
| 3  | TTTTTTTT CCGCGTAA                                      |
| 4  | TTTTTTTT CCAACAGG                                      |
| 5  | TATGGTGA TTTTTTTT TTTTTTTT TGGCACCC                    |
| 6  | ATCCGAAG TTTTTTTT TTTTTTTT CGCGGACA                    |
| 7  | CGCTGATC TTTTTTTT TTTTTTTT GGGGATGA ATCCTTCC AACATCTC  |
| 8  | TCGATAT TTTTTTTT TTTTTTTT GCACTGCC CCTACTCT CACCTTTC   |
| 9  | ATATCAGA GAGCACAG                                      |
| 10 | TCCGGGAT GGGTGCCA                                      |
| 11 | AGAGTCTG GAGATGAT                                      |
| 12 | GCTTCGGC CTTGTTGG                                      |
| 13 | TAATATAA TGTCCGGG GATCAGCG AATTTCGAC                   |
| 14 | AGTTAGCA TTACGCGG GTACCTCG GACCGCTA                    |
| 15 | GGAAGGAT TCATCCCC TTTAAGAA TGATCGCA CCAGGTTA AGTGGCTC  |
| 16 | TACATCTC GCTCGTCC TCACCATA ATCCACCA CCCATGCA GAAAGATA  |
| 17 | GCGCGCTT CTGTGCTC ATCCCTTG CCCCAGAA                    |
| 18 | TCCCTAAA GTCGAATT GAGATGTA AGTTTCAC                    |
| 19 | ACCTTTTA ATCATCTC CAGACTCT TTTTTTTT TTTTTTTT GAGCCGAT  |
| 20 | GGGAGATT TAGCGGTC CAGGGTAC TTTTTTTT TTTTTTTT GGACGAGC  |
| 21 | CAGTCTTT GAGATGTT GAAACATCT TTTGGTTG                   |
| 22 | AAGGTAAT GTGAAACT CAATGATA TGACGGAT                    |
| 23 | ACATCTCG GAAAGGTT AGAGTAGG GGCAGTGC TCAGCCAA ACAGTGGG  |
| 24 | CTTACACT TTCCGGAG CAAGGGAT ATCGGCTC CTTCGGAT TCTCTGGC  |
| 25 | TATCATTT GCCAGAGA TGCTAATC GTATGACG GACCAGGT CTCCTAGG  |
| 26 | TGCATGGG TGGTGGAT CGCGAAGC TGCTGTGA ATGATCGG TCATATGT  |
| 27 | ACAATGGT ATCTTTTG AAGCGCAC GTAACCCG TAATTCGG AGCCCGGC  |
| 28 | ACCTGGTC CGTCATAC TAAAAGTT AGAAGTAA GTAGGGTA CCGCTGGG  |
| 29 | GCTCTTAA TATCTTTC GGTTCGGG GAGTAAGG                    |
| 30 | GTTTAGTG ATCCGTC AACTATTG TATTGGCC                     |
| 31 | CACAGGAA GAGCCACT TAACTTGG TGGCATCA ATCCCGGA CACGTA    |
| 32 | CCACAAAG TCTTGTAT AAAGACTG TGCAGAGT CTTTACGC GCTTGAAC  |
| 33 | TTCCTTTT CAACAAA AGATGTTT CCCCATGT TTATATTA CAAAAGAT   |
| 34 | CCGAATTA CGGTTTAC CGAGATGT TTTACTTG ACTTGGGA TTAGGATC  |
| 35 | CTTCCCTG GGCCAATA CTTTGGTG TCCACTAT                    |
| 36 | CAGTCCGA CCTAGGAG CGGTCTGG CTGTGAGG                    |
| 37 | GCGTAAAG ATCTCGCA TTTCTGGT CCAAAACT AATCATA TCACGGTT   |
| 38 | TTCAAGCAG CCTTACTC CCGCAACT TTTACGTT TTTAGGGA ATACAAGA |
| 39 | GTGCTCTT GAGCGGTT TAAAGAGC CTCGCTTC AAGTCCGT GTCGGTAG  |
| 40 | AAAACCTC ACATATGA CCGATCAT TCACGACA AATCTCCC GCTAGATG  |
| 41 | ATGGAGCTG GCCGGGCT ATTAATCT CACGATCA                   |
| 42 | GTTGTTCC ATAGTGA AAGAGCAC GTTAACTC                     |
| 43 | GTAGTTTA CCCAGCGG TACCCTAC TTTACTCT AGTGTAAG CAACCCAT  |
| 44 | GCACTCAA CCTCACAG CCGAGCCG CATCTAGT ATTACTTT CACCGCTC  |
| 45 | GCCGACTC GTTCAAGC ACTATTAT CTGGCTAT                    |
| 46 | ACTGAGGC GAGTTAAT TTTATGTT TAACCTGC                    |
| 47 | TCATGTGG GATCCTAA TCCCAACT GCAAGTAA AAAAGGAA TTATGAGA  |
| 48 | GATCACAA ATATGGCA AAAGTAAT ATGGGTTG CACTAAAC TATAGCAA  |
| 49 | GAACATAA TTGTATA TCGGACTG TGGGCGTA CCTACACC ACAGATGC   |
| 50 | AGCGACTT GAAGCGAG GAGGTTTT GCGACTCA TTGCTGAG TTCGAGTC  |
| 51 | ATATAGGT CTGACACC CAGCTCCC AGGTAAGT GTATTATC GCGTCAAT  |
| 52 | GGTGTAGG TACGCCCA TAAACTAC TTTTCCAC GTTGCCCT CGACCGAT  |
| 53 | GGAGGGTT CTACCGC ATAT1TCT TTTGCCCT                     |
| 54 | TGTTGAGG GCAGGTTA ACCTATAT AGCCATTT                    |
| 55 | AGCTTGGG AACCGTGA GTATGAT AGTTTGG CTGCTGAA TGTCCGTG    |
| 56 | GCACCATT TGACACC GGTTCGCG CAGCAGA CATCTTTT GGGTTCGT    |
| 57 | AGCCTACG ATAGCCAG ATAATAGT TCTCATA CAGGCAAG GGTGTACG   |
| 58 | GATAATAC ACTTACTC CCACATGA AGGTCTAC CAGAAGCT ATGTACCC  |
| 59 | CGGAGAG AAATGGCT AATGTTCG ACAAATATG                    |
| 60 | CGTCCAGC GCATCTGT GATCCAGC TCAGATTT                    |
| 61 | AAAAGATG TCTGTAC CCAAGCTT TAGCATAA AACTGTG TGTCTTAT    |
| 62 | TGCCAAGT AAGGGCAA AGCAATAT CACGGACA GGAACAAC GGGTGTCA  |
| 63 | GCGTATGC TGAATGGA AACCTCCC TACGTTTT GCGATGTT GATGGGAA  |
| 64 | TTTAGTTT GCGTCGAA CTCAGCAA TGAGTCCG TTGAGTCG GTGGATAA  |
| 65 | ATCGCTCA ATTGACGC GACTTTGT GTAATCTC                    |
| 66 | CATACACA CATATTGT GCATACGC CCTGTGTT                    |
| 67 | CTGAGCGT ATCCGTCG AGGGCAAC GTGAAAA TTGTGATC CCCTCCCA   |
| 68 | AATAGGCT ATTCAAGA GCTGAGC TGGCGGAG GCACGTAT GTCTTGAG   |
| 69 | TAGGGCTA AAATCTGA CGTGGATC TTATCCAC GCCTCACT CCATTTCA  |
| 70 | ACCATCGC AAAACGTA AAACATAA TGACGTTT GAGGTGAT ACGTAAAG  |
| 71 | GCGGCTGG ACGACCCC GCCGTGGC ACGACTGA                    |
| 72 | GTAATGCG AAAACAGG AGCCTATT CATCAAGG                    |
| 73 | GATATCCA CGGTACAT AGTTTCTG GTAGACCT CGTAGGCT AGAGCGGT  |
| 74 | TATTAAGT TTTCCGCG TGAGCGAT CAATGACC TCATATGG ACACACCA  |
| 75 | GATCTCGA GAGATTAC ACAAGTCT TGGGAGGG CCTCAACA TCTTGAAT  |
| 76 | ATACGTGC CTCGCGCA ACGCTCAG CCGTCTCG TAGGGTGA CGTATTAG  |
| 77 | CAAATCCC TTCCCATC AAATACGA CTAAGCCG                    |
| 78 | CGTTGCAC CCTGTGAT ACTTAATA TTAAGGTT                    |
| 79 | GTTTGTCT ATAGGACA CAACAGTT TTATGCTA ACTTGGAC CGGGCATC  |
| 80 | GCAGGGTG AAAGTGAG CCGAGCCG GCGCAGGG CTCGACGG TTAATTTG  |
| 81 | ACTCTCGT TCAGTCTG CGCACGGC ACCGCTCT CTCTCCGC CGGCGAAA  |
| 82 | CCATATGA GGTCAATT TGGATATC TCCGTGCA GTAAACGA TAGGTTTC  |

Table continues ...

| ID  | Sequence                                               |
|-----|--------------------------------------------------------|
| 83  | CCAGTAAT AGCCTGAA CACCCTGC ATCGACGG                    |
| 84  | CTAGCAT CTCACAGC CTGGGAAG TAGTAAAG                     |
| 85  | CCGTGAG CCCTGCGC GACAAACG CATATCCT GTTTACTT AGGGATGG   |
| 86  | TCTGGCGC CGGCTTAG TCGTATTT GATGCCCG TGTGTATG CTCACCTT  |
| 87  | AAAAGATC ATAACGTT GGGATTTG TTCCCGCT ATAGGTAA CTGGGTTT  |
| 88  | GTCAATTT CTTTACGT ATCACCTC AAACGCTA TAGCCCTA CGGATCAA  |
| 89  | GAATTATA TGGTGTGT CCATATCA ACAAAACC                    |
| 90  | GCGCGGAA CCGTCGAT GATCTTTC GGACCGAG                    |
| 91  | GGCTTGCA CTAATACG TCACCCTA CAGACCGG TCAGGATC ATTTTGGG  |
| 92  | TTTGTAAA CTTACCTA ATTCACAG TTGATCCG CGCATTAC AACGTTAT  |
| 93  | CGGCGCGC CAAAATTA TAGTCGAT CATGCTTC                    |
| 94  | AGCTCATT CTCGGTCC AATTCGAG CATGTCCC                    |
| 95  | AAGCAAGA GAAACCTA TCGTITAC TGCAACGA ACGAGAGT GCTGGCAT  |
| 96  | TGGGCCCG GGGTTTGT TGATATGG TCCAAAAT GTGCAACG GGAACACG  |
| 97  | CTCGAATT GTGTTTCC ATGCTAGC GCCACAGC ACTACTTA AGACTTAG  |
| 98  | TTACTTAT AGGCGGAA AAATTGAC ATTTCTAC AATCGTGA CGGTTTCT  |
| 99  | CTTCTACC TCTTAATG TATAATCT ATCCTGTG GATTACGG GCGGTTAG  |
| 100 | TAAGTAGT CGTGTGGC TGCAAGCC CTCACCTG ACCTCTTA GCACAATA  |
| 101 | CCTAACAT AAACCCAG CGTGACGG TGAATCTT                    |
| 102 | GTGTAAGA GGGACATG GTGAGAAG GAACTCTG                    |
| 103 | ATTACCGT CCATCCCT AAGTAAAC AGGATATG GCGCCAGA CCACAATG  |
| 104 | GCGGATGG AAAACGAC GCGGGCCG GGAAGGAC CTTTAGCC CCAAGGAG  |
| 105 | TCCCAACG GAAGCGTA ATCGACTA ATCGACAG CATTACCG CATTAAAG  |
| 106 | CCGTAATC CACAGGAT TCTTGCTT ATCTTAGT CCCCAGT GCTACATG   |
| 107 | CATGGAAG CAGAGTTC CCATCGCG AAAATTGA                    |
| 108 | AACCCGCG CTAAGTCT TTAGAATC ACCTTAGG                    |
| 109 | GCCTAAAG GTCCTTCC ACGGTAAT CCGGGGTG TACGAACT CAACGCAC  |
| 110 | CTCAGTTT AAGATTCA CCGTCACG CATTGTGG TTCGCCCG GTCGTTTT  |
| 111 | GACCCCTC AGATCCCA ATGTTTAGC ATGTTAGC GTGCAACG GAAACACG |
| 112 | TCTTCAA AGAAAACG TCACGATT GTAGAAAT TTTACAAA GACGGACA   |
| 113 | AATGTTCT CTAAGCCG AGTAAACA ATCAAGGA                    |
| 114 | GAGGAGGT TCAATTTT AGAGCTCG AGCGGAGT                    |
| 115 | GTAGGCTC TATTGTGC TAAGAGGT CAGGTGAG CCGGGCCA ATTGTACC  |
| 116 | ACGGAAAC TCCTACCC GCGCGGTT GATGTCCG TCGCAAAA GCAAGCCG  |
| 117 | GTCGCGCA CTAAGTCT GATTCTAA TGTCCCTG AATGAGCT TGGGATTC  |
| 118 | GAAATATC TGTAGCT TTTGAAGA AGGCTCCG TCATTCCG TCCCCCAA   |
| 119 | ACTCCGGC CTCTTGG TATATTAG CTTACCCA                     |
| 120 | GACCCGAC ACTCGCTT GTTCCCTT                             |
| 121 | GCGATTCC CATGTAGC ACTTGGGG ACTAAGAT CGTTGCGA ATTTTCCG  |
| 122 | GTTACCCG TATAATTA AGAACATT CCGGTTCC GCGAATTG AGTACAAG  |
| 123 | GCGCAGTT TCCTTGAT TGTTACTT GGTACAAT CTTTACAG GCGGTAGG  |
| 124 | TTTTCGCA GGCACATC GAGCTTAC CCGTCTAT AGCAGAAAT GGTATAAA |
| 125 | CACCTACC GTGTCCTT CGTCTGCT CCGGTCCC                    |
| 126 | ATATTACA AAGAACGC GCGGTAAC ATCACATA                    |
| 127 | CGAGTCGT GTGCGTTG AGTTCGTA CACCCCGG AAAGTACG GAGAACAT  |
| 128 | CCTAGGCG TAAGACCT GCGCGGAG AGACGTGC CACGCGAG CTATGTAG  |
| 129 | CGCTGTCT TGGGTAAG CTAATATA GCGAAATG CATTACAG GGTATATA  |
| 130 | CAATCCCG CGAACCCG CGAATCGC AGGACGAT CTCGTTCC GGTGCTAC  |
| 131 | ACGTGGTC TATGTGAT CGCTAGG CTAACCTC                     |
| 132 | GCGACACA CGGCTTGC TGGACACA ATTTTAT                     |
| 133 | CTCGGTG GCACGTCT ACGACTCG TCGAACGA GCTCCGGT AGTCTCAA   |
| 134 | ATTTTGGC GGAACGGG ACAGGACG ATGTTTCT ACCTTTC AGGTCTTA   |
| 135 | CACGAGCT TTTACGCG GGTAGGTT TAAGACCT GCGCTTCA GCGGTAAC  |
| 136 | TAGCCGCC TTGGGGGA CGGAATGA CCGAGCCT TCCGCCAC CCCTGACA  |
| 137 | GAGTCCAC CTTGTACT CTTATCTC TCACCAGG                    |
| 138 | GCGGATGC GAGGTTAG AGTCTGGC AAGCGGTT                    |
| 139 | TCCCAATC TTTATACC ATTCTGCT ATAGACGG AACTGCGC GTCACCTC  |
| 140 | AGGGATTG AGTACCCA TGTGTCCG AGATGCGA TATGACAG GTGAGCAC  |
| 141 | TTCCGCGC ATAAAACT TGGTCGCA TGTCAAGG GTCGATAA GGGTAAAG  |
| 142 | TCAGGCGC AGGTCTTA GCGGCGTA CGTCTATT TAACGTGC CTGATCAC  |
| 143 | GGACTGTT CTACATAG TGACTTTG ACGAGGTT                    |
| 144 | TCAGCGCC AACCCGTT CAATCCCT AGCCGTTT                    |
| 145 | GCATGCCG GTAGCACC CGAACGAG ATGCTCTC AGACGAGC GATCTCTC  |
| 146 | ATGACTCC AGGAGAGG GTGAGCTC CTACGTGG TGACGAAG AATACCTG  |
| 147 | ATAACCAT CCTGGTGA AGGATAAG GCGAGATC TGTAAAT TGGTACT    |
| 148 | CTGTATA TGCCATCT GATTGGGA GAGTCCAG GCAATAAA GAAACTGC   |
| 149 | TTCATTAC GTTCTACG CGATGCTT TTGCCACA                    |
| 150 | CCTACGCC GAACGGCT GGAGTCAT CTCGGCAT                    |
| 151 | AGTTTCTT TTGAGACT ACCCGAGC TCGTTCGA GCCAAAAT CAAGGACG  |
| 152 | AGTTAGAT CCATGCGA AACAGTCC GTATAGCG CCGACTG CCTCGACA   |
| 153 | GCGTAAA AACCTCGT CCAAGTCA AGGAGATC GACCAAGT GCTCTCTC   |
| 154 | CTTGTGTA CCACGTAG CCGCATGC AGCACCGA TATTGTAG GTCTTGGC  |
| 155 | AAGTGTTA ATGCCGAG ATCTAATC TGATTTTT                    |
| 156 | CCGACCCT GTGCTCAC GCACGAGA GCGCTTCC                    |
| 157 | TCACCTGG CGTATAC AGGAAACT CAGGGGGC GAAGATAG AGAGCATA   |
| 158 | TAAAGATG TGTGGCAA AAGCATCG CGTCTTGT GCATCCCG TCGCATGG  |
| 159 | AAAGATGG TCTACATC AGGATAAG GCGAGTGG AAGCAGAG CATTTTGA  |
| 160 | TACAGCGG GTGATCAG GCACGTTA AATAGACG GCGCGGAA GACCTCCG  |
| 161 | AAGAGCAA ACGGTATT ATCCGTTT CACAGCGC                    |
| 162 | ACATGAGG AAAAAATCA CCATTTCT GTGCCAGT                   |
| 163 | TTACCTCT GCAGTTTC TTTATTGC CTGGACTC ATGGTTAT CCCTTCCC  |
| 164 | TTACCAGC GTGCGGCC AGGTCCGG ACGAGCTT ACCCATGG CGCACCAC  |
| 165 | TTTTCCT GGAAGCCT TCTCTGCT CCGCGTGC GCGCTGTA GATGTAGA   |
| 166 | CTCTGCTT ATCTATCC CCGCTGAA AGGATTAT TCAATAAT GCACCTGC  |
| 167 | TCCCTGTC TGTGAGC CCAGCGAC CACTTCTG                     |
| 168 | TCTAGCC ACTGGCAC CTTGGTAA TCTGGGCT                     |
| 169 | CAGCTTGA CGCAAGAC GTCAATA TGCCTGCT TTTAACCG TTTAGACC   |
| 170 | ATTCAGAA TCGAGACC TTGCTCTT GGAGCTCT CCATCAGA TGGAGCTG  |

Table continues ...

| ID  | Sequence                                               |
|-----|--------------------------------------------------------|
| 171 | TGGACCAC GCGCTGTG AACGGGAT GGGAAAGG GCGGTAGG GGCCGCAC  |
| 172 | CCATGGGT ACTGCTGT GAGGGTAA CACGTTGG ACTCCTAC TGCCCCGCC |
| 173 | TTCAACAA TCAAAATG ATATTGTA GCGAGATA                    |
| 174 | CTACATTT AGCCCGA TTCTGAA CTGGGGCT                      |
| 175 | AACCTACTG TATGCTCT CTATCTTC GCCCCTCG CATCTTAA ATATAACT |
| 176 | CTAGTAAC CGACCGTT GACAGGGA CCACCCTG TCTTTCTC GTATATCA  |
| 177 | CTAGGACC CAGAAGTG GTGCTGGG GGTCTAAA TAACACTT GGTCTCGA  |
| 178 | TCTGATGG AGACGTCC TCAAGCTG CTGCCACG TGATTAGC GCTTAGGG  |
| 179 | CATTCTAT AGCCCGCG GTTACTAG GCGCCTTG                    |
| 180 | GATGATCT GTGGTGGC CACAATTT GCTGGGAA                    |
| 181 | GAGAAAGA TGCGGTGG CAGTAGTT GTGATTAG AATTCGCT AAACCGGA  |
| 182 | TATCCGCC TATCTCGC TACAATAT AGTTATAT CCTCATGT AACGGTCG  |
| 183 | ATTAAGCT GTGGAATG TTGTTGAA CATACTCC TCATTAGG GTCCACCG  |
| 184 | TTCCCTAAC GCAGGTGC ATTATTGA ATAATCCT AGGAAATA CCACTGCC |
| 185 | AGGGTTCA CAGCTCCA AAGCCTGT CGAGGCGT                    |
| 186 | GACTCTCT CAAGCGCC AGCTTAAT TAGTAAGG                    |
| 187 | TGTTTTAA GCGCGGCA GTAGGAGT CCAACGTG GTGGTCCA CGGCGACG  |
| 188 | CTTTTCTG CTTCAGC AAATTTGT GCGAGTGG GGCTAGAA CATTCCAC   |
| 189 | CTTGGGGG TGATATA CTCACTAA ACTCCTTC                     |
| 190 | CCTCCTAC CCTTACTA GCGGTACA CACCAAGA                    |
| 191 | AACCTACC CCTAAGC GCTAATCA CTGGGCG GGTCTAG GTTGAGA      |
| 192 | TTACAGCG ACGCTCGC ACAGGCTT CGTCGCCG AAATGTAG CCATGAAT  |
| 193 | TGTACCCG ATTCATGG AGATCATC CATTGACG TCGTITAGG TTTTTTTT |
| 194 | CCTAATGA GGAGTAGT GTTAGGAA TACCTGCT CCTGAATG TTTTTTTT  |
| 195 | CTCCTACG CTCATAGT TGAACCTT TACTATCG                    |
| 196 | AGAGTTCT ACCAGCCA AGAGAGTC GCAGCCCT                    |
| 197 | CGTAACGA CGTCAATG TAAACACA ACAACCGA                    |
| 198 | CATTACAG AGCAGGTA CAGAAAAA GAACCGAC                    |
| 199 | TTTTTTTT CGATAGTA GGTAGGTT TTTTTTTT                    |
| 200 | TTTTTTTT AGGGCTGC CCCCAGAG TTTTTTTT                    |
| 201 | TTTTTTTT CGGTGGAC AGAATCTT TTTTTTTT                    |
| 202 | TTTTTTTT TCTTGGTG CGTAGGAG TTTTTTTT                    |
| 203 | TTTTTTTT TCGGTTGT CGCTGTAA TTTTTTTT                    |
| 204 | TTTTTTTT GTCCGTTT GATAGGAC TTTTTTTT                    |
| 205 | TTTTTTTT TCCGGTTT AGCGAATT CTAAATCA GCGCGATA TGGCTGGT  |
| 206 | TTTTTTTT GAAGGAGT TTAGTGAG TCTGCAAC ATAGAATG CTATTGAG  |
| 207 | CAGACTCT TTTTTTTT TTTTTTTT GAGCCGAT                    |
| 208 | CAGGGTAC TTTTTTTT TTTTTTTT GGACGAGC                    |
| 209 | TCTGATAT TTTTTTTT TTTTTTTT GCACTGCC                    |
| 210 | CGCTGATC TTTTTTTT TTTTTTTT GGGGATGA                    |
| 211 | CAAGGGAT ATCGGCTC CTTCCGTT TCTCTGGC                    |
| 212 | TACATCTC GCTCGTCC TCACCATA ATCCACCA                    |
| 213 | AGAGTAGG GGCAGTGC TCAGCCAA ACAGTGGG                    |
| 214 | GGAAAGAT TCATCCCC TTTAAGAA TGATCGCA                    |
| 215 | TATCATTG GCCAGAGA TGCTAATC GTATGACG                    |
| 216 | TGCATGGG TGGTGGAT CGCGAAGC TGTCGTGA                    |
| 217 | AGATGTTT CCCACTGT TTATATTA CAAAAGAT                    |
| 218 | TAACCTGG TGCGATCA ATCCCGGA CAGCTAAA                    |
| 219 | ACCTGGTC CGTCATAC TAAAAGGT AGAAGTAA                    |
| 220 | CCGATCAT TCACGACA AATCTCCC GCTAGATG                    |
| 221 | ACAATGGT ATCTTTTG AAGCGCAC GTAACCCG                    |
| 222 | CCGCAACC TTTACGTG TTTAGGGA ATACAAGA                    |
| 223 | TACCCTAC TTACTTCT AGTGTAAG CAACCCAT                    |
| 224 | CAAGCCG CATCTAGC ATTACCTT CACCCGTC                     |
| 225 | CCGAATTA CGGTTTAC CGAGATGT TTTACTGC                    |
| 226 | CCACAAAG TCTTGTAT AAAGACTG TGCGAGAT                    |
| 227 | AAAGTAAT ATGGGTGG CACTAACC TATAGCAA                    |
| 228 | GTGCTCTT GAGCGGTG TTAAGAGC CTCGCTTC                    |
| 229 | TCCCAAGT GCAAGTAA AAAAGGAA TTAAGAGA                    |
| 230 | CGGTAAG ATCTCGCA TTCTGGTG CAAAACCT                     |
| 231 | GAACATAA TTGCTATA TCGGACTG TGGGCGTA                    |
| 232 | ACGGACTT GAAGCGAG GAAAGTTT GCGACTCA                    |
| 233 | ATAATAGT TCTATAA CAGGCAAG GGTGCTAG                     |
| 234 | GTATGATT AGTTTTGG CTGCTGAA TGTCCTGG                    |
| 235 | GGTGTAGG TACGCCCA TAAACTAC TTTTCCAC                    |
| 236 | CTCAGCAA TGAGTCGC TTGAGTGC GTGGATAA                    |
| 237 | ATATAGGT CTGACACC CAGCTCCC AGGTAAGT                    |
| 238 | AGCAATAT CACGGACA GGAACAAC GGGTGTCA                    |
| 239 | AGGGCAAC GTGGAAAA TTGTGATC CCTCCCA                     |
| 240 | CGTGGATC TTATCCAC GCCTCAGT CCATTTCA                    |
| 241 | GATAATAC ACTTACCT CCACATGA AGGTCTAC                    |
| 242 | CGACCATT TGACACCC GAGTCGGC GTGACAGA                    |
| 243 | ACAAAGTC TGGGAGGG CCTCAACA TCTTGAAT                    |
| 244 | GCGTATGC TGAATGAG AACCTCTC TACGTTTT                    |
| 245 | AGTTTCTG GTAGACCT CGTAGGCT AGAGCGGT                    |
| 246 | AAAAAGAT TCTGTGAC CCCAAGCT TAGCATAA                    |
| 247 | AATAGGCT ATTCAAGA GCTGGAGC TGCCGCGAG                   |
| 248 | ACCATCGC AAAACGTA AAACCTAAA TGACGTTT                   |
| 249 | CGCACGGC ACCGCTCT CTCTCCGC CGCGGAAA                    |
| 250 | CAACAGTT TTATGCTA ACTTGGAC CGGGCATC                    |
| 251 | ATACGTGC CTCGCGCA ACGCTCAG CCGGCTCG                    |
| 252 | ATCACCTC AAACGTCA TAGCCCTA CGGATCAA                    |
| 253 | TATTAAGT TTTCCCGC TGAGCGAT CAATGACC                    |
| 254 | TCGTATTT GATGCCCG TGTGTATG CTCACTTT                    |
| 255 | TCACCCTA CAGACCCG TCAGGATC ATTTTGGG                    |
| 256 | ATTCCAG TTGATCCG CGCATTAC AACGTTAT                     |
| 257 | CCATATGA GGTCAATG TGGATATC TCCGTGCA                    |
| 258 | CGAGGGTG AAAGTGAG CCAGCCGC GCGCAGGG                    |

Table continues ...

| ID  | Sequence                             |
|-----|--------------------------------------|
| 259 | TGATATGG TCCAAAAT GTGCAACG GAAAACAC  |
| 260 | GAAAGATC ATAAAGCT GGGATTTG TTCCGCCT  |
| 261 | TCGTTTAC TGCACGGA ACGAGAGT GCTGGCAT  |
| 262 | CCGTCGAG CCCTCGCG GACAAACG CATATCCT  |
| 263 | CTCGAATT GTGTTTCC ATGCTAGC GCCACACG  |
| 264 | TTACCTAT AGGCGGAA AAATTGAC ATTTCTAC  |
| 265 | ATCGACTA ATGCCAGC ATTACTGG CATTAAAG  |
| 266 | AAGTAAAC AGGATATG GCGCCAGA CCACAATG  |
| 267 | TAAGTAGT CGTGTGGC TGCAAGCC CTCACCTG  |
| 268 | TCACGATT GTAGAAAT TTTACAAA GACGGACA  |
| 269 | CTTCTACC TCTAATG TATAATTC ATCCTGTG   |
| 270 | CCGTCACG CATTGTGG TTCGCCGC GTCGTTTT  |
| 271 | TAAGAGGT CAGGTGAG CGGGCCCA ATGTACC   |
| 272 | GATTCTAA TGTCGGTC AATGAGT TGGGATCT   |
| 273 | CCGTAATC CACAGGAT TCTTGCTT ATCTTAGT  |
| 274 | GCCGATGG AAAACGAC CGGGCCGC GGAAGGAC  |
| 275 | TGTTTACT GTTACAAT TCTTACAC GGGTAGGA  |
| 276 | CGACTCT AGATCCCA ATGTTAGG AGCTAACA   |
| 277 | ACTTGGGG ACTAAGAT CGTTGCGA ATTTTCCG  |
| 278 | GCCTAAAG CACTTCC ACGGTAAT CGGGGGTG   |
| 279 | ACGGAAAC TCCTACC GCGCGGTT GATGTGCC   |
| 280 | GAAATATC TGTAGCT TTTGAAAG AGGCTCCG   |
| 281 | CTAATATA GCGAAATC CTTCCATG TAATTATA  |
| 282 | AGTTCGTA CACCCCGG AAACCTGAG GAGAATAT |
| 283 | TTTTCGCA GGCACATC GAGCCTAC CCGTCTAT  |
| 284 | CGGAATGA CGGAGCCT TCCGCCAC CCGGCACA  |
| 285 | GTTACCGC TATAATTA AGAACATT CGGGTTCG  |
| 286 | ACAGGACG ATGTCTC ACCTCTTC AGGCTTAA   |
| 287 | ATTCGCT ATAGACGG AACTGCGC GTCACCTG   |
| 288 | TGGTCGCA TGTCAGGG GTCCGGTC GCCGTAAA  |
| 289 | CAATTCCC CGAACCCG CGAATCGC AGGACGAT  |
| 290 | CCTAGGCG TAAGACCT GCCGCTGC AGACCTGC  |
| 291 | AGGATAAG GCAGTGAC TGTAATAT TGGTACT   |
| 292 | GCCAGACT TTTACGGC GGTAGGTT TAAGACCT  |
| 293 | CGAACGAG ATCGTCT AGACGACG GCTACTCT   |
| 294 | CTCGGTG GCACGTCT ACGACTCG TCGAACGA   |
| 295 | AGGGATTG AGTACCCA TGTGTCCG AGATGGCA  |
| 296 | TCAGGGCG AGGTCTTA GCGGGTAA GCGTATT   |
| 297 | CAAAGTCA AGGAGATC GACCACGT CCTCTCT   |
| 298 | ACCCGAGC TCGTTCGA GCCAAAAT CAAGGACG  |
| 299 | CTGTGATA TGCCATCT GATTGGGA GCGCTCAG  |
| 300 | GCACGTTA AATAGACG GCGCGGAA GACCTCCG  |
| 301 | ATGACTCC AGGAGAGG GTGAGCTC CTACGTGG  |
| 302 | AAGCATCG CGTCCTTG GCATCCCG TACGTATG  |
| 303 | TTTATTGC CTGGACTC ATGGTTAT CCCTTCCC  |
| 304 | TCTCGTGC CCGAGGTC GCCGCTGA GATGTAGA  |
| 305 | CTTCGCTA CCACGTAG CGGCATGC AGACGCA   |
| 306 | AGTTAGAT CCATGCGA AACAGTCC GTATAGCC  |
| 307 | AACGGGAT GGGAAAGG GCGCTAGG GGCCGCAC  |
| 308 | AAGAATGG TCTACATC GTAATGAA GGATAGAT  |
| 309 | GTCAAATA TGCGTCT TTTAACGC TTTAGACC   |
| 310 | TCACTGGG CGCTATAC AGGAAACT CGAGGGGG  |
| 311 | TTACCAGC GTGCCGCG AGGTCCGG ACAGCAGT  |
| 312 | CTCTGCTT ATCTATCC CCGCTGAA AGGATTAT  |
| 313 | GTCGCTGG GGTCTAAA TAAACTTT GGTCTCGA  |
| 314 | CTATCTTC CCCCCTCG CATCTTAA ATATAACT  |
| 315 | CCATGGGT ACTGTGTT GAGGGTAA CAGTGGG   |
| 316 | ATTATTGA ATAACTCT AGGAAATA CCACTGCC  |
| 317 | ATTCAGAA TCGAGACC TTGCTCTT GAGCGTCT  |
| 318 | TACAATAT AGTTATAT CCTCATGT AACGGTGC  |
| 319 | GTAGGAGT CCAACGTG GTGGTCCA CCGCCACG  |
| 320 | AAATTTGT GGCAGTGG GGCTAGAA CATTCCAC  |
| 321 | TCTGATGG AGACGTCC TCAAGTGC CTGCCAG   |
| 322 | CTAGTAAC CGACCGTT GACAGGGA CCGCCGCA  |
| 323 | ACAGGCTT CGTCGCCG AAATGTAG CCATGAAT  |
| 324 | ATTAAGCT GTGGAATG TTGTTGAA CATACTCC  |
| 325 | GCTAATCA CTGGGCAG GTCCTAG GTTGACGA   |
| 326 | GAGAAAGA TGCCGTGG CAGTAGTT GTGATTAG  |
| 327 | TGTACCGC ATTCATGG AGATCATC CATTGACG  |
| 328 | CCTAATGA GGAGTATG GTTAGGAA GTTAGCT   |
| 329 | TTAGTGAG TCTGCAAC ATAGAATG CTATTGAG  |
| 330 | AGCGAATT CTAATCAC GCGCGATA TGGCTGGT  |
| 331 | ACTTTTTA ATCATCTC                    |
| 332 | GGGAGATT TAGCGGTC                    |
| 333 | CCTACTCT CACTTTTC                    |
| 334 | ATCCTTCG AACATCTC                    |
| 335 | CTTACACT TTCGGGAG                    |
| 336 | CCCATGCA GAAAGATA                    |
| 337 | ACATCTCG GAAAGGTG                    |
| 338 | CCAGGTTA AGTGGCTC                    |
| 339 | GACCAGGT CTCTTAGG                    |
| 340 | ATGATCGG TCATATGI                    |
| 341 | TTCTTTT CAACCAAA                     |
| 342 | CACCAGAA GAGCCACT                    |
| 343 | TAGGGTGA CCGCTGGG                    |
| 344 | AAAACCTC ACATATGA                    |
| 345 | TAATTCGG AGCCCGCC                    |
| 346 | TTCAGCAG CCTTACTC                    |

Table continues ...



| ID  | Sequence          |
|-----|-------------------|
| 347 | GTAGTTA CCCAGCGG  |
| 348 | CRACTCAA CCTCACAG |
| 349 | ACTTGGGA TTAGGATC |
| 350 | CTTTACGC GCTTGAAC |
| 351 | GATCACAA ATATGGCA |
| 352 | AAGTCCGT GTCGGTAG |
| 353 | TCATGTGG GATCCATA |
| 354 | AATCATA TCACGGTT  |
| 355 | CCTACACC ACAGATGC |
| 356 | TTGCTGAG TTCGACGC |
| 357 | AGCCTACG ATAGCCAG |
| 358 | AGCTTGGG AACCGTGA |
| 359 | GTTGCCT CGACCGAT  |
| 360 | TTTAGTTT GCGTCGAA |
| 361 | GTATTATC GCGTCAAT |
| 362 | GTCCAAGT AAGGCGAA |
| 363 | CTGAGCGT ATCGGTCG |
| 364 | TAGGGCTA AAATCTGA |
| 365 | CAGAAACT ATGTACCG |
| 366 | CATCTTTT GGGGTCGT |
| 367 | GATCCTGA GAGATTAC |
| 368 | GCGATGGT GATGGGAA |
| 369 | GATATCCA CGGTACAT |
| 370 | AACTGTTG TGCCTAT  |
| 371 | GCACGTAT GCTTTGAG |
| 372 | GAGGTGAT ACGTAAAG |
| 373 | ACTCTCGT TCAGTCGT |
| 374 | CGTTTGTC ATAGGACA |
| 375 | TAGGGTGA CGTATTAG |
| 376 | GTCAATTT CTTTACGT |
| 377 | TCATATGG ACACACCA |
| 378 | TCTGGCGC CGGCTTAG |
| 379 | GGCTTGCA CTAATACG |
| 380 | TTGTAAA CTTACCTA  |
| 381 | GTAACGTA TAGGTTTC |
| 382 | CTGACGG TTAATTTG  |
| 383 | TGGGCCCG GGGTTTGT |
| 384 | ATAGGTAA CTGGGTTT |
| 385 | AAGCAAGA GAAACCTA |
| 386 | GTTTACTT AGGGATGG |
| 387 | ACTACTTA AGACTTAG |
| 388 | AATCGTGA CGGTTTCT |
| 389 | TCGCAACG GAAGCGTA |
| 390 | ATTACCGT CCATCCCT |
| 391 | ACCTCTTA GCACAATA |
| 392 | TCTTCAAA AGAAACCG |
| 393 | GATTACGG CGGCTTAG |
| 394 | CTCAGTTT AAGATTCA |
| 395 | GTAGGCTC TATTGTGC |
| 396 | GTGGCGGA CCTAAGGT |
| 397 | CCCAAGT GCTACATG  |
| 398 | CTTTAGGC CCAAGGAG |
| 399 | GCGCAGTT TCCTTGAT |
| 400 | GATATTTT AAGGACAC |
| 401 | GCGATTCC CATGTAGC |
| 402 | TACGAACT CAACGCAC |
| 403 | TGCGAAAA GCAAGCCG |
| 404 | TCATTCCG TCCCCCAA |
| 405 | CGTCGTCT TGGGTAAG |
| 406 | CGAGTCGT GTGCGTTG |
| 407 | AGCAGAAT GGTATAAA |
| 408 | TAGCCGCC TTGGGGGA |
| 409 | GGGAATTG AGTACAAG |
| 410 | ATTTTGGC GGAACGGG |
| 411 | TCCCAATC TTTATACC |
| 412 | TTCCGCGC ATAAAACT |
| 413 | CTCGTTCC GGTGCTAC |
| 414 | CACGCGAG CTATGTAG |
| 415 | ATAACCAT CTGGTGA  |
| 416 | CGCCCTGA CGTAGAAC |
| 417 | GCAATGCC GTAGCACC |
| 418 | GCTCGGGT AGTCTCAA |
| 419 | TATGACAG GTGAGCAC |
| 420 | TAACTGTC CTGATCAC |
| 421 | GCGTAAAA AACCTCGT |
| 422 | AGTTTCTT TTGAGACT |
| 423 | GCAATAAA GAAACTGC |
| 424 | TTACGCGG GTGATCAG |
| 425 | TGACCAAG AATACCGT |
| 426 | TTAAGATG TGTGGCAA |
| 427 | TTACCTCT CGAGTTTC |
| 428 | TATTTCTT GGAAGCCT |
| 429 | TATTTGAC GTCTTGCG |
| 430 | CCCAGTGA GCTCGACA |
| 431 | TGGACCAC GCGCTGTG |
| 432 | AAGCAGAG CATTTTGA |
| 433 | CAGCTTGA CGCAAGAC |
| 434 | GAAGATAG AGAGCATA |

Table continues ...

| ID  | Sequence          |
|-----|-------------------|
| 435 | ACCCATGG CGCACCAC |
| 436 | TCAATAAT GCACCTGC |
| 437 | CTAGGACC CAGAAGTG |
| 438 | AACTACTG TATGCTCT |
| 439 | ACTCTTAC TGCCCGCC |
| 440 | TTCCTAAC GCAGGTGC |
| 441 | CCATCAGA TGGAGCTG |
| 442 | TATCCGCC TATCTCGC |
| 443 | TGTTTTAA GCGGGGCA |
| 444 | CTTTTCTG CTTCACGC |
| 445 | TGATTAGC GCTTAGGG |
| 446 | TCTTCTC GTATATCA  |
| 447 | TTACAGCG ACGCCTCG |
| 448 | TCATTAGG GTCCACCG |
| 449 | AACCTACC CCCTAAGC |
| 450 | AATTCGCT AAACCGGA |
| 451 | TCGTTACG TTTTTTTT |
| 452 | CCTGAATG TTTTTTTT |
| 453 | TTTTTTTT GAAGGAGT |
| 454 | TTTTTTTT TCCGGTTT |

The following bricks were used in all structures investigated:

1, 2, 3, 4, 5, 6, 9, 10, 11, 12, 13, 14, 17, 18, 21, 22, 29, 30, 35, 36, 41, 42, 45, 46, 53, 54, 59, 60, 65, 66, 71, 72, 77, 78, 83, 84, 89, 90, 93, 94, 101, 102, 107, 108, 113, 114, 119, 120, 125, 126, 131, 132, 137, 138, 143, 144, 149, 150, 155, 156, 161, 162, 167, 168, 173, 174, 179, 180, 185, 186, 189, 190, 195, 196, 197, 198, 199, 200, 201, 202, 203, 204

In addition to the bricks common to all structures, the following bricks were used for each class of structure studied.

The **no-BB** system (330 bricks in total):

207, 208, 209, 210, 211, 212, 213, 214, 215, 216, 217, 218, 219, 220, 221, 222, 223, 224, 225, 226, 227, 228, 229, 230, 231, 232, 233, 234, 235, 236, 237, 238, 239, 240, 241, 242, 243, 244, 245, 246, 247, 248, 249, 250, 251, 252, 253, 254, 255, 256, 257, 258, 259, 260, 261, 262, 263, 264, 265, 266, 267, 268, 269, 270, 271, 272, 273, 274, 275, 276, 277, 278, 279, 280, 281, 282, 283, 284, 285, 286, 287, 288, 289, 290, 291, 292, 293, 294, 295, 296, 297, 298, 299, 300, 301, 302, 303, 304, 305, 306, 307, 308, 309, 310, 311, 312, 313, 314, 315, 316, 317, 318, 319, 320, 321, 322, 323, 324, 325, 326, 327, 328, 329, 330, 331, 332, 333, 334, 335, 336, 337, 338, 339, 340, 341, 342, 343, 344, 345, 346, 347, 348, 349, 350, 351, 352, 353, 354, 355, 356, 357, 358, 359, 360, 361, 362, 363, 364, 365, 366, 367, 368, 369, 370, 371, 372, 373, 374, 375, 376, 377, 378, 379, 380, 381, 382, 383, 384, 385, 386, 387, 388, 389, 390, 391, 392, 393, 394, 395, 396, 397, 398, 399, 400, 401, 402, 403, 404, 405, 406, 407, 408, 409, 410, 411, 412, 413, 414, 415, 416, 417, 418, 419, 420, 421, 422, 423, 424, 425, 426, 427, 428, 429, 430, 431, 432, 433, 434, 435, 436, 437, 438, 439, 440, 441, 442, 443, 444, 445, 446, 447, 448, 449, 450, 451, 452, 453, 454

The **edge-BB** system (268 bricks in total):

8, 15, 19, 23, 26, 28, 31, 34, 37, 40, 43, 47, 50, 52, 55, 58, 61, 64, 67, 70, 73, 76, 79, 82, 85, 88, 91, 95, 98, 100, 103, 106, 109, 112, 115, 118, 121, 124, 127, 130, 133, 136, 139, 142, 145, 148, 151, 154, 157, 160, 163, 166, 169, 172, 175, 178, 181, 184, 187, 191, 194, 205, 208, 210, 211, 212, 215, 217, 221, 222, 224, 226, 227, 228, 231, 233, 237, 238, 240, 242, 243, 244, 247, 249, 253, 254, 256, 258, 259, 260, 263, 265, 269, 270, 272, 274, 275, 276, 279, 281, 285, 286, 288, 290, 291, 292, 295, 297, 301, 302, 304, 306, 307, 308, 311, 313, 317, 318, 320, 322, 323, 324, 327, 329, 332, 334, 335, 336, 339, 341, 345, 346, 348, 350, 351, 352, 355, 357, 361, 362, 364, 366, 367, 368, 371, 373, 377, 378, 380, 382, 383, 384, 387, 389, 393, 394, 396, 398, 399, 400, 403, 405, 409, 410, 412, 414, 415, 416, 419, 421, 425, 426, 428, 430, 431, 432, 435, 437, 441, 442, 444, 446, 447, 448, 451, 453

The **face-BB** system (268 bricks in total):

7, 16, 20, 24, 25, 27, 32, 33, 38, 39, 44, 48, 49, 51, 56, 57, 62, 63, 68, 69, 74, 75, 80, 81, 86, 87, 92, 96, 97, 99, 104, 105, 110, 111, 116, 117, 122, 123, 128, 129, 134, 135, 140, 141, 146, 147, 152, 153, 158, 159, 164, 165, 170, 171, 176, 177, 182, 183, 188, 192, 193, 206, 207, 209, 213, 214, 216, 218, 219, 220, 223, 225, 229, 230, 232, 234, 235, 236, 239, 241, 245, 246, 248, 250, 251, 252, 255, 257, 261, 262, 264, 266, 267, 268, 271, 273, 277, 278, 280, 282, 283, 284, 287, 289, 293, 294, 296, 298, 299, 300, 303, 305, 309, 310, 312, 314, 315, 316, 319, 321, 325, 326, 328, 330, 331, 333, 337, 338, 340, 342, 343, 344, 347, 349, 353, 354, 356, 358, 359, 360, 363, 365, 369, 370, 372, 374, 375, 376, 379, 381, 385, 386, 388, 390, 391, 392, 395, 397, 401, 402, 404, 406, 407, 408, 411, 413, 417, 418, 420, 422, 423, 424, 427, 429, 433, 434, 436, 438, 439, 440, 443, 445, 449, 450, 452, 454

The **half-face-BB** system (299 bricks in total):

7, 16, 20, 32, 38, 39, 44, 56, 62, 63, 69, 80, 86, 87, 92, 104, 110, 111, 117, 128, 134, 135, 141, 152, 158, 159, 165, 176, 182, 183, 188, 207, 209, 211, 213, 214, 215, 216, 217, 218, 219, 220, 221, 223, 225, 227, 229, 230, 231, 232, 233, 234, 235, 236, 237, 239, 241, 243, 245, 246, 247, 248, 249, 250, 251, 252, 253, 255, 257, 259, 261, 262, 263, 264, 265, 266, 267, 268, 269, 271, 273, 275, 277, 278, 279, 280, 281, 282, 283, 284, 285, 287, 289, 291, 293, 294, 295, 296, 297, 298, 299, 300, 301, 303, 305, 307, 309, 310, 311, 312, 313, 314, 315, 316, 317, 319, 321, 323, 325, 326, 327, 328, 329, 330, 331, 333, 335, 337, 338, 339, 340, 341, 342, 343, 344, 345, 347, 349, 351, 353, 354, 355, 356, 357, 358, 359, 360, 361, 363, 365, 367, 369, 370, 371, 372, 373, 374, 375, 376, 377, 379, 381, 383, 385, 386, 387, 388, 389, 390, 391, 392, 393, 395, 397, 399, 401, 402, 403, 404, 405, 406, 407, 408, 409, 411, 413, 415, 417, 418, 419, 420, 421, 422, 423, 424, 425, 427, 429, 431, 433, 434, 435, 436, 437, 438, 439, 440, 441, 443, 445, 447, 449, 450, 451, 452, 453, 454

The **all-BB** system (206 bricks in total):

7, 8, 15, 16, 19, 20, 23, 24, 25, 26, 27, 28, 31, 32, 33, 34, 37, 38, 39, 40, 43, 44, 47, 48, 49, 50, 51, 52, 55, 56, 57, 58, 61, 62, 63, 64, 67, 68, 69, 70, 73, 74, 75, 76, 79, 80, 81, 82, 85, 86, 87, 88, 91, 92, 95, 96, 97, 98, 99, 100, 103, 104, 105, 106, 109, 110, 111, 112, 115, 116, 117, 118, 121, 122, 123, 124, 127, 128, 129, 130, 133, 134, 135, 136, 139, 140, 141, 142, 145, 146, 147, 148, 151, 152, 153, 154, 157, 158, 159, 160, 163, 164, 165, 166, 169, 170, 171, 172, 175, 176, 177, 178, 181, 182, 183, 184, 187, 188, 191, 192, 193, 194, 205, 206

## 6 REFERENCES

- <sup>1</sup>Y. Ke, L. L. Ong, W. M. Shih, and P. Yin, "Three-dimensional structures self-assembled from DNA bricks," *Science* **338**, 1177 (2012).
- <sup>2</sup>M. Sajfudinow, K. Uhlig, A. Prager, C. Schneider, B. Abel, and D. M. Smith, "Nanoscale patterning of self-assembled monolayer (SAM)-functionalised substrates with single molecule contact printing," *Nanoscale* **9**, 15098 (2017).
- <sup>3</sup>M. I. Mitov, M. L. Greaser, and K. S. Campbell, "GelBandFitter – A computer program for analysis of closely spaced electrophoretic and immunoblotted bands," *Electrophoresis* **30**, 848 (2009).
- <sup>4</sup>S. W. Provencher, "A constrained regularization method for inverting data represented by linear algebraic or integral equations," *Comput. Phys. Commun.* **27**, 213 (1982).
- <sup>5</sup>S. Hansen, "DLSanalysis.org: a web interface for analysis of dynamic light scattering data," *Eur. Biophys. J.* **47**, 179 (2018).
- <sup>6</sup>H. Zipper, H. Brunner, J. Bernhagen, and F. Vitzthum, "Investigations on DNA intercalation and surface binding by SYBR Green I, its structure determination and methodological implications," *Nucleic Acids Res.* **32**, e103 (2004).
- <sup>7</sup>J.-P. J. Sobczak, T. G. Martin, T. Gerling, and H. Dietz, "Rapid folding of DNA into nanoscale shapes at constant temperature," *Science* **338**, 1458 (2012).
- <sup>8</sup>J. SantaLucia Jr and D. Hicks, "The thermodynamics of DNA structural motifs," *Annu. Rev. Biophys. Biomol. Struct.* **33**, 415 (2004).
- <sup>9</sup>R. T. Koehler and N. Peyret, "Thermodynamic properties of DNA sequences: Characteristic values for the human genome," *Bioinformatics* **21**, 3333 (2005).
- <sup>10</sup>W. Wang, T. Lin, S. Zhang, T. Bai, Y. Mi, and B. Wei, "Self-assembly of fully addressable DNA nanostructures from double crossover tiles," *Nucleic Acids Res.* **44**, 7989 (2016).
- <sup>11</sup>Y. Ke, L. L. Ong, W. Sun, J. Song, M. Dong, W. M. Shih, and P. Yin, "DNA brick crystals with prescribed depths," *Nat. Chem.* **6**, 994 (2014).
- <sup>12</sup>S. Giglio, P. T. Monis, and C. P. Saint, "Demonstration of preferential binding of SYBR Green I to specific DNA fragments in real-time multiplex PCR," *Nucleic Acids Res.* **31**, e136 (2003).
- <sup>13</sup>D. Suh and J. B. Chaires, "Criteria for the mode of binding of DNA binding agents," *Bioorg. Med. Chem.* **3**, 723 (1995).
- <sup>14</sup>K. M. Ririe, R. P. Rasmussen, and C. T. Wittwer, "Product differentiation by analysis of DNA melting curves during the polymerase chain reaction," *Anal. Biochem.* **245**, 154 (1997).
